# Supplementary material for: Natural-Product-Inspired Microwave-Assisted Synthesis of Novel Spirooxindoles as Antileishmanial Agents: Synthesis, Stereochemical Assignment, Bioevaluation, SAR, and Molecular Docking Studies
Source: MDPI journal article supplement (doi:10.3390/molecules28124817), 2023-06-16
Supplement: s1 [file s1]

# Supporting Information

## Natural-Product-Inspired Microwave-Assisted Synthesis of Novel Spirooxindoles as Antileishmanial Agents: Synthesis, Stereochemical Assignment, Bioevaluation, SAR, and Molecular Docking Studies

Nawal Kishore Sahu <sup>1,2,†</sup>, Ritu Sharma <sup>1,†</sup>, Kshirsagar Prasad Suhas <sup>3</sup>, Jyoti Joshi <sup>4</sup>, Kunal Prakash <sup>5</sup>, Richa Sharma <sup>1</sup>, Ramendra Pratap <sup>5</sup>, Xiwen Hu <sup>6</sup>, Sukhbir Kaur <sup>4</sup>, Mukesh Jain <sup>1</sup>, Carmine Coluccini <sup>7,\*</sup>, Paolo Coghi <sup>6,\*</sup> and Sandeep Chaudhary <sup>1,3,\*</sup>

<sup>1</sup> Laboratory of Organic and Medicinal Chemistry (OMC Lab), Department of Chemistry, Malaviya National Institute of Technology, Jawaharlal Nehru Marg, Jaipur 302017, India; nawal.chemistry@gmail.com (N.K.S.); rtsharma312@gmail.com (R.S.); richasharmachem1@gmail.com (R.S.); mjain.chy@mnit.ac.in (M.J.)

<sup>2</sup> Department of Chemistry, Government Engineering College, Bharatpur 321303, India

<sup>3</sup> Department of Medicinal Chemistry, National Institute of Pharmaceutical Education and Research, Raebareli (NIPER-R), New Transit Campus, Bijnor-Sisendi Road, Sarojini Nagar, Near CRPF Base Camp, Lucknow 226002, India; kshirsagarprasad06@gmail.com

<sup>4</sup> Parasitology Laboratory, Department of Zoology, Panjab University, Chandigarh 160014, India; jyotijoshi86@gmail.com (J.J.); puzoology@yahoo.com (S.K.)

<sup>5</sup> Department of Chemistry, University of Delhi, North Campus, Delhi 110007, India; kunp93@gmail.com (K.P.); ramendrapratap@gmail.com (R.P.)

<sup>6</sup> School of Pharmacy, Macau University of Science and Technology, Avenida Wai Long, Taipa, Macau, China; 1909853vpa11003@student.must.edu.mo

<sup>7</sup> Institute of New Drug Development, College of Medicine, China Medical University, No. 91, Hsueh-Shih Road, Taichung 40402, Taiwan

\* Correspondence: carmine.coluccini@mail.cmu.edu.tw (C.C.); coghips@must.edu.mo (P.C.); schaudhary.chy@mnit.ac.in or schaudhary.chy@niperraebareli.edu.in (S.C.); Tel.: +91-141-2713319 or +91-522-2975587 (S.C.); Fax: +91-141-2529029 (S.C.).

† These authors contributed equally to this work.

| S. No. | Contents                                                                                                                                                              | Page No. |
|--------|-----------------------------------------------------------------------------------------------------------------------------------------------------------------------|----------|
| 1.     | General experimental conditions                                                                                                                                       | S3       |
| 2.     | General Procedure for the Synthesis of Chalcones <b>21a-f</b>                                                                                                         | S3       |
| 3.     | General Procedure (GP) for the Synthesis of Spirooxindole Derivatives, <b>23a-f</b> , <b>24a-f</b> , and <b>25a-g</b> .                                               | S3       |
| 4.     | Biological Methods: Parasite strain and culture conditions, <i>In-vitro</i> anti-leishmanial activity: Trypan blue dye exclusion method, and Plasmid relaxation assay | S3-S4    |
| 5.     | Characterization data of spirooxindole derivatives ( <b>23a-f</b> , <b>24a-f</b> , <b>25a-g</b> )                                                                     | S4-S10   |

|    |                                                                                                                                    |                |
|----|------------------------------------------------------------------------------------------------------------------------------------|----------------|
| 6. | <b>X-ray Crystallography:</b> Single crystal data of spirooxindole <b>23f</b>                                                      | <b>S11-S18</b> |
| 7. | <sup>1</sup> H & <sup>13</sup> C NMR spectral data of all the synthesized compounds <b>23a-f</b> , <b>24a-f</b> and <b>25a-g</b> . | <b>S19-S37</b> |

## Experimental Details & Characterization Data

### General experimental

After oven drying, all glass apparatus was utilised. High-quality reagents such as Sigma Aldrich (USA), TCI Chemicals (Tokyo, Japan), and Spectrochem (India) were used. Prior to usage, laboratory-grade commercial reagents and solvents were purified using conventional techniques. The IR spectra were recorded on a Bruker ECO-ATR spectrometer in cm<sup>-1</sup>. The Jeol resonance spectrometer (400 MHz for <sup>1</sup>H; 100 MHz for <sup>13</sup>C) was used to record NMR spectra. CDCl<sub>3</sub> and DMSO-*d*<sub>6</sub> are used as the residual solvents. Chemical shifts (δ) from low to high fields are given in parts per million (ppm). A Gevo G-2 S Q-TOF was used to perform electrospray emission mass spectrometry (ESI-MS) and high-resolution mass spectrometry (HRMS). Melting points (mp, °C) in an open capillary were determined using a manual melting point apparatus. Analytical thin-layer chromatography was carried out using Merck TLC Silica Gel F<sub>254</sub> plates under UV light (λ = 254 nm). Rankem silica gel (particle size: 100-200 mesh) obtained from Rankem<sup>TM</sup> (India) was used for column chromatography. The microwave-assisted synthesis was carried out in a microwave synthesis reactor (Monowave 200, manufactured by Anton Paar) equipped with continuous stirring and infrared temperature sensors. The Optical rotation of chiral compounds was taken in

Polarimeter (MCP 100, manufactured by Anton Paar) at 20 °C. The docking studies of compounds were carried out using Discovery Studio visualizer software.

### **General Procedure for the Synthesis of Chalcones 21a-f**

The synthesis of target compounds begins with the production of substituted chalcone. Methanol (15 mL) was used to dissolve the substituted acetophenones (7.1 mmol), substituted aldehydes (7.1 mmol), and sodium hydroxide (17.78 mmol), which were then agitated for 7 hours at room temperature. After stirring, the reaction mixture was then added to the crushed ice. In order to produce chalcones **21a-f**, the precipitate of the crude product was filtered under vacuum, washed with distilled water, air-dried, and recrystallized with ethanol.

### **General Procedure (GP) for the Synthesis of Spirooxindole Derivatives, 23a-f, 24a-f, and 25a-g.**

A mixture of chalcone (0.38 mmol, 1 equiv.), isatin (0.57 mmol, 1.5 equiv.), amino acid (0.57 mmol, 1.5 equiv.), and carbinol (CH<sub>3</sub>OH, 10 mL) was added in a microwave vial (10 mL). The reaction mixture was microwave-irradiated in a microwave synthesis reactor (Anton Paar, Monowave 200) with the following conditions: temperature 80°C, rpm: 600, and time: 5 min. The reaction was evaluated using TLC in an ethyl acetate: hexane (3:7) solvent system. When the reaction was complete, the crude product was extracted with ethyl acetate. After the solvent was removed under high vacuum, the pure product was obtained by column chromatography on silica gel using eluting solvents of ethyl acetate and hexane (7:3 v/v) as the mobile phase. The reaction yields range from 71 to 98%.

## **Biological Methods**

### **Parasite strain and culture conditions:**

The SSG-sensitive Indian strain of *Leishmania donovani* (MHOM/IN/1983/AG83) obtained from CSIR-IICT, Kolkata, was used for the study. The promastigotes of these strains were maintained in Medium 199+10% FCS (Foetal Calf Serum) by serial sub-culturing at an ambient temperature of 22±1°C every 72 hours.

### ***In vitro* antileishmanial activity**

#### **Trypan blue dye exclusion method**

For carrying out the antileishmanial activity *in vitro*, promastigotes of *Leishmania donovani* were used. The promastigotes were harvested from the culture vials, counted, and  $2 \times 10^6$  cells/well were seeded in a 48-well culture plate. Further, compounds at various concentrations (2 µg/mL, 4 µg/mL, 8 µg/mL and 16 µg/mL) were added in triplets. No drug was added to the well serving as a blank, and amphotericin B was added to the well serving as the positive control. The plate was incubated at  $22 \pm 1^\circ\text{C}$  in the BOD incubator for 72 hours. After 72 hours, each well was counted for the number of viable parasites using the trypan blue dye exclusion method, and the percentage growth inhibition was calculated by using the formula:

$$\text{Percentage viability} = \frac{\text{No. of viable cells in treated well}}{\text{No. of viable cells in blank well}} \times 100$$

$$\text{Percentage growth inhibition} = 100 - \text{percentage viability}$$

IC<sub>50</sub> (inhibitory concentration at which 50% of the parasites were dead) was obtained by plotting a linear dose-response curve in SPSS software (Version 23).

### Plasmid relaxation assay

The relaxation of supercoiled plasmid DNA is the method used for the determination of LTopIB activity. Various doses of each compound were treated with one unit of pure LTopIB (the enzyme to relax 0.5  $\mu$ g of supercoiled DNA for 30 min at 37 °C) for 20 min at 4 °C. The reaction mixture including 0.5  $\mu$ g of supercoiled *p*Bluescript SK(–) plasmid, 10 mM Tris-HCl buffer pH 7.5, 5 mM MgCl<sub>2</sub>, 0.1 mM EDTA, 15  $\mu$ g/mL bovine serum albumin, and 150 mM KCl was then added in a final volume of 20  $\mu$ L. After 30 minutes at 37 °C, the reaction mixtures were stopped by adding 4  $\mu$ L of loading buffer, which included 5% sarkosyl, 0.12% bromophenol blue, and 25% glycerol. By electrophoresis, the topoisomers were separated in 1% agarose gels were electrophoresed at 2 V/cm for 16 hours in a 0.1 M Tris-borate-EDTA buffer (pH 8.0) after being stained with ethidium bromide (0.5  $\mu$ g/mL). Plotting the percentage of supercoiled DNA versus drug concentrations allowed researchers to determine the 50% inhibition concentration (IC<sub>50</sub>) values of LTopIB inhibition as the 50% reduction of supercoiled DNA.

### Characterization data of spirooxindole derivatives (23a-f, 24a-f, 25a-g).

**(1'*S*,2'*R*,3*S*,7a'*S*)-1'-(4-chlorophenyl)-2'-(4-fluorobenzoyl)-5-methyl-1',2',5',6',7',7a'-hexahydrospiro[indoline-3,3'-pyrrolizin]-2-one (23a):** The product was synthesized utilizing the microwave-irradiated approach, and purified by column chromatography over silica gel using hexane/EtOAc (8:2) as an eluent; Physical Appearance: light yellow solid; Yield: 98%; R<sub>f</sub>(EtOAc/hexane: 1:1) = 0.48; m.p. 182-184 °C; [ $\alpha$ ]<sub>D</sub><sup>20</sup> = -6.34°; FT-IR (KBr,  $\nu$  max/cm<sup>-1</sup>) 3736.66, 3614.43, 2924.65, 2862.34, 2357.42, 1703.18, 1597.66, 1489.73, 1226.66, 1090.56, 947.62, 817.90; <sup>1</sup>H NMR (400 MHz, CDCl<sub>3</sub>)  $\delta$  7.70 (s, 1H), 7.45 – 7.39 (m, 4H), 7.28 – 7.26 (m, 2H), 6.98 (s, 1H), 6.91 – 6.81 (m, 3H), 6.43 (d, *J* = 8 Hz, 1H), 4.78 (d, *J* = 11.2 Hz, 1H), 4.21 – 4.15 (m, 1H), 3.87 – 3.81 (m, 1H), 2.70 – 2.56 (m, 2H), 2.32 (s, 3H), 2.04 – 1.87 (m, 4H); <sup>13</sup>C NMR (100 MHz, CDCl<sub>3</sub>)  $\delta$  195.45, 180.71, 138.32, 137.96, 133.52, 133.49, 132.84, 131.98, 130.65, 130.56, 130.00, 129.52, 128.93, 128.14, 124.90, 115.46, 115.25, 109.78, 73.61, 71.92, 64.69, 52.33, 48.24, 36.71, 30.64, 29.77, 27.31, 21.29; HRMS (ESI) calcd. for C<sub>28</sub>H<sub>24</sub>ClFN<sub>2</sub>O<sub>2</sub> [M+H]<sup>+</sup>: 475.1583; found 475.1587.

**(1'*S*,2'*R*,3*S*,7a'*S*)-5-fluoro-2'-(4-fluorobenzoyl)-1'-(4-methoxyphenyl)-1',2',5',6',7',7a'-hexahydrospiro[indoline-3,3'-pyrrolizin]-2-one (23b):** The product was synthesized utilizing the microwave-irradiated approach, and purified by column chromatography over silica gel using hexane/EtOAc (7:3) as an eluent; Physical Appearance: light yellow solid; Yield: 66%; R<sub>f</sub>(EtOAc/hexane: 1:1) = 0.45; m.p. 161-163 °C; [ $\alpha$ ]<sub>D</sub><sup>20</sup> = -9.34°; FT-IR (KBr,  $\nu$  max/cm<sup>-1</sup>) 3736.63, 2923.44, 2857.29, 2357.28, 1708.92, 1596.95, 1468.94, 1300.00, 1237.16, 1181.69, 1025.49, 813.43, 771.52; <sup>1</sup>H NMR (400 MHz, CDCl<sub>3</sub>)  $\delta$  8.65 (s, 1H), 7.50 – 7.47 (m, 2H), 7.40 – 7.37 (m, 2H), 7.02 – 6.99 (m, 1H), 6.87 – 6.81 (m, 5H), 6.59 – 6.55 (m, 1H), 4.82 (d, *J* = 11.6 Hz, 1H), 4.21 – 4.15 (m, 1H), 3.83 – 3.77 (m, 1H), 3.74 (s, 3H), 2.65 – 2.61 (m, 2H), 2.04 – 1.98 (m, 1H), 1.94 – 1.88 (m, 2H), 1.73 – 1.67 (m, 1H); <sup>13</sup>C NMR (100 MHz, CDCl<sub>3</sub>)  $\delta$  195.11, 181.38,

166.97, 164.43, 159.95, 158.73, 157.55, 136.52, 133.43, 133.40, 131.28, 130.75, 130.66, 129.04, 126.94, 126.87, 116.28, 116.04, 115.54, 115.33, 115.28, 114.25, 110.84, 110.76, 74.15, 72.03, 64.48, 55.29, 52.29, 48.15, 30.83, 27.55; HRMS (ESI) calcd. for  $C_{28}H_{24}F_2N_2O_3$   $[M+H]^+$ : 475.1828; found 475.1835.

**(1'S,2'R,3S,7a'S)-2'-(4-bromobenzoyl)-5-fluoro-1'-(4-methoxyphenyl)-1',2',5',6',7',7a'-hexahydro spiro[indoline-3,3'-pyrrolizin]-2-one (23c):** The product was synthesized utilizing the microwave-irradiated approach, and purified by column chromatography over silica gel using hexane/EtOAc (7:3) as an eluent; Physical Appearance: off white solid; Yield: 62%;  $R_f$ (EtOAc/hexane: 1:1) = 0.46; m.p. 126-128 °C;  $[\alpha]^{20}_D = -8.33^\circ$ ; FT-IR (KBr,  $\nu$  max/cm $^{-1}$ ) 3737.67, 3315.31, 2920.61, 2854.37, 2357.91, 1728.24, 1473.76, 1391.61, 1257.77, 1176.07, 1032.00, 981.91, 854.02, 810.50, 768.51, 678.70;  $^1H$  NMR (400 MHz,  $CDCl_3$ )  $\delta$  7.65 (s, 1H), 7.39 – 7.29 (m, 6H), 6.99 – 6.97 (m, 1H), 6.85 – 6.82 (m, 3H), 6.53 – 6.50 (m, 1H), 4.81 (d,  $J$  = 11.6 Hz, 1H), 4.21 – 4.16 (m, 1H), 3.80 – 3.77 (m, 1H), 3.75 (s, 3H), 2.64 – 2.61 (m, 2H), 2.06 – 1.87 (m, 4H);  $^{13}C$  NMR (100 MHz,  $CDCl_3$ )  $\delta$  195.82, 180.62, 159.95, 158.77, 157.54, 136.29, 136.26, 135.75, 131.63, 131.17, 129.54, 129.04, 128.39, 126.85, 126.77, 116.32, 116.09, 115.58, 115.33, 114.26, 110.66, 110.58, 73.88, 72.00, 64.59, 55.31, 52.29, 48.14, 30.78, 27.54; HRMS (ESI) calcd. for  $C_{28}H_{24}F_2N_2O_3$   $[M+H]^+$ : 535.1027; found 535.1037.

**(1'S,2'R,3S,7a'S)-2'-(4-bromobenzoyl)-5-methoxy-1'-(4-methoxyphenyl)-1',2',5',6',7',7a'-hexahydro spiro[indoline-3,3'-pyrrolizin]-2-one (23d):** The product was synthesized utilizing the microwave-irradiated approach, and purified by column chromatography over silica gel using hexane/EtOAc (7:3) as an eluent; Physical Appearance: Pale yellow solid; Yield: 93%;  $R_f$ (EtOAc/hexane: 1:1) = 0.46; m.p. 107-109 °C;  $[\alpha]^{20}_D = +9.13^\circ$ ; FT-IR (KBr,  $\nu$  max/cm $^{-1}$ ) 2926.14, 2856.60, 1710.37, 1585.99, 1479.19, 1392.20, 1191.17, 1031.76, 807.41, 641.56;  $^1H$  NMR (400 MHz,  $CDCl_3$ )  $\delta$  7.56 (m, 1H), 7.41 (d,  $J$  = 8.8 Hz, 2H), 7.34 – 7.29 (m, 4H), 6.86 – 6.83 (m, 3H), 6.68 – 6.66 (m, 1H), 6.51 – 6.48 (m, 1H), 4.81 (d,  $J$  = 11.2 Hz, 1H), 4.23 – 4.17 (m, 1H), 3.81 (s, 3H), 3.76 (s, 3H), 2.71 – 2.60 (m, 2H), 2.06 – 1.98 (m, 1H), 1.95 – 1.86 (m, 2H), 1.75 – 1.68 (m, 2H);  $^{13}C$  NMR (100 MHz,  $CDCl_3$ )  $\delta$  196.00, 180.57, 158.68, 155.52, 135.92, 133.76, 131.52, 129.55, 129.10, 128.14, 126.39, 114.91, 114.20, 113.94, 110.33, 74.00, 72.04, 64.65, 56.00, 55.30, 52.22, 48.20, 30.83, 27.50; HRMS (ESI) calcd. for  $C_{29}H_{27}BrN_2O_4$   $[M+H]^+$ : 547.1227; found 547.1217.

**(1'S,2'R,3S,7a'S)-2'-(4-bromobenzoyl)-1'-(4-methoxyphenyl)-5-nitro-1',2',5',6',7',7a'-hexahydro spiro[indoline-3,3'-pyrrolizin]-2-one (23e):** The product was synthesized utilizing the microwave-irradiated approach, and purified by column chromatography over silica gel using hexane/EtOAc (7:3) as an eluent; Physical Appearance: light brown solid; Yield: 83%;  $R_f$ (EtOAc/hexane: 1:1) = 0.46; m.p. 111-113 °C;  $[\alpha]^{20}_D = +8.45^\circ$ ; FT-IR (KBr,  $\nu$  max/cm $^{-1}$ ) 3737.96, 3676.06, 2921.84, 2357.32, 1736.40, 1682.32, 1512.82, 1335.88, 1247.44, 1027.44, 1024.09, 825.82, 746.30;  $^1H$  NMR (400 MHz,  $CDCl_3$ )  $\delta$  8.13 – 8.11 (m, 2H), 7.81 (s, 1H), 7.39 – 7.30 (m, 6H), 6.85 – 6.83 (m, 2H), 6.72 – 6.69 (m, 1H), 4.86 (d,  $J$  = 11.2 Hz, 1H), 4.24 – 4.19 (m, 1H), 3.89 – 3.84 (m, 1H), 3.75 (s, 3H), 2.63 – 2.59 (m, 2H), 2.07 – 1.92 (m, 3H), 1.79 – 1.72 (m, 1H);  $^{13}C$  NMR (100 MHz,  $CDCl_3$ )  $\delta$  195.32, 180.45, 158.91, 145.87, 143.37, 143.16, 135.51, 131.89,

130.56, 129.48, 129.00, 128.84, 126.51, 126.25, 123.48, 73.11, 71.97, 64.55, 55.31, 52.49, 48.18, 30.60, 27.63; HRMS (ESI) calcd. for  $C_{28}H_{24}BrN_3O_5$   $[M+H]^+$ : 562.0972; found 562.1021.

**(1'S,2'R,3S,7a'S)-2'-benzoyl-5-bromo-1'-phenyl-1',2',5',6',7',7a'-hexahydrospiro[indoline-3,3'-pyrrolizin]-2-one (23f)** : The product was synthesized utilizing the microwave-irradiated approach, and purified by column chromatography over silica gel using hexane/EtOAc (7:3) as an eluent; Physical Appearance: creamy white solid; Yield: 71%;  $R_f$  (EtOAc/hexane = 2:3): 0.37; m.p.: 175-177 °C;  $[\alpha]^{20} = +12.61^\circ$ ; FT-IR (KBr,  $\nu$  max/cm<sup>-1</sup>) 3437.04, 1740.57, 1713.85, 1674.72, 1469.14, 737.54, 692.44; <sup>1</sup>H NMR (400 MHz, CDCl<sub>3</sub>)  $\delta$  8.53 (s, 1H), 7.49 (d,  $J$  = 7.6 Hz, 2H), 7.1 (d,  $J$  = 7.6 Hz, 2H), 7.35 – 7.28 (m, 4H), 7.26 – 7.23 (m, 1H), 7.21-7.13 (m, 3H), 6.48 (d,  $J$  = 8.4 Hz, 1H), 4.92 (d,  $J$  = 11.6 Hz, 1H), 4.24 – 4.19 (m, 1H), 3.90 – 3.83 (m, 1H), 2.69 – 2.58 (m, 2H), 2.04 – 1.73 (m, 4H); <sup>13</sup>C NMR (100 MHz, CDCl<sub>3</sub>)  $\delta$  196.72, 180.88, 139.73, 139.51, 137.03, 133.15, 132.46, 130.49, 128.81, 128.30, 128.16, 127.98, 127.48, 127.16, 115.19, 111.63, 73.75, 72.18, 64.59, 52.93, 48.28, 30.76, 27.52; HRMS (ESI) calcd for  $C_{27}H_{24}BrN_2O_2(M+H^+)$ : 487.1016; found, 487.1012.

**(3S,3'R,4'S,5'S)-5'-benzyl-4'-(4-chlorophenyl)-5-methoxy-3'-(4-nitrobenzoyl)spiro[indoline-3,2'-pyrrolidin]-2-one (24a)**: The product was synthesized utilizing the microwave-irradiated approach, and purified by column chromatography over silica gel using hexane/EtOAc (7:3) as an eluent; Physical Appearance: off white solid; Yield: 89%;  $R_f$  (EtOAc/hexane: 1:1) = 0.47; m.p. 188-190 °C;  $[\alpha]^{20} = -9.36^\circ$ ; FT-IR (KBr,  $\nu$  max/cm<sup>-1</sup>) 3741.44, 3406.50, 2925.60, 2856.39, 2359.93, 1707.29, 1525.89, 1341.38, 1196.99, 968.10, 810.00, 738.94, 694.52; <sup>1</sup>H NMR (400 MHz, CDCl<sub>3</sub>)  $\delta$  7.99 – 7.97 (d,  $J$  = 8.4 Hz, 2H), 7.53 (s, 1H), 7.48 – 7.43 (m, 3H), 7.30 – 7.26 (m, 4H), 7.21– 7.12 (m, 5H), 6.52 – 6.49 (m, 1H), 6.38 (d,  $J$  = 2 Hz, 1H), 6.26 (d,  $J$  = 8.8 Hz, 1H), 4.50 (d,  $J$  = 10.8 Hz, 1H), 4.29 – 4.24 (m, 1H), 3.82 – 3.77 (m, 1H), 3.68 (s, 3H), 2.98 – 2.94 (m, 1H), 2.72 – 2.67 (m, 1H); <sup>13</sup>C NMR (100 MHz, CDCl<sub>3</sub>)  $\delta$  195.79, 181.25, 156.39, 150.16, 149.97, 141.45, 141.29, 137.60, 134.80, 132.80, 130.29, 130.06, 129.55, 128.75, 128.64, 128.58, 127.70, 126.88, 126.71, 123.36, 115.14, 111.93, 110.03, 68.68, 64.63, 64.10, 55.98, 52.03, 38.80; HRMS (ESI) calcd. for  $C_{32}H_{26}ClN_3O_5$   $[M+H]^+$ : 568.1634; found 568.1692.

**(3S,3'R,4'S,5'S)-5'-benzyl-4'-(4-bromophenyl)-3'-(4-methylbenzoyl)-5-nitrospiro[indoline-3,2'-pyrrolidin]-2-one (24b)**: The product was synthesized utilizing the microwave-irradiated approach, and purified by column chromatography over silica gel using hexane/EtOAc (7:3) as an eluent; Physical Appearance: off white solid; Yield: 95%;  $R_f$  (EtOAc/hexane: 1:1) = 0.42 ; m.p. 121-122 °C;  $[\alpha]^{20} = -13.12^\circ$ ; FT-IR (KBr,  $\nu$  max/cm<sup>-1</sup>) 3736.91, 2923.49, 2358.09, 1739.91, 1602.85, 1516.32, 1330.77, 1179.63, 1092.61, 751.40, 696.21; <sup>1</sup>H NMR (400 MHz, CDCl<sub>3</sub>)  $\delta$  7.97 – 7.93 (m, 2H), 7.83 (d,  $J$  = 2.4 Hz, 1H), 7.47 – 7.39 (m, 4H), 7.27 – 7.14 (m, 8H), 6.95 (d,  $J$  = 8.0 Hz, 2H), 6.51 (d,  $J$  = 8.4 Hz, 1H), 4.51 (d,  $J$  = 10.4 Hz, 1H), 4.25 – 4.19 (m, 1H), 3.94 – 3.89 (m, 1H), 2.97 – 2.93 (m, 1H), 2.72 – 2.67 (m, 1H), 2.23 (s, 3H); <sup>13</sup>C NMR (100 MHz, CDCl<sub>3</sub>)  $\delta$  195.68, 181.94, 145.37, 144.51, 143.81, 138.09, 137.94, 134.30, 132.12, 130.88, 130.33, 129.30, 129.26, 128.66, 127.81, 126.78, 126.06, 122.27, 121.32, 109.21, 68.27,

65.02, 62.91, 52.24, 39.39, 21.65; HRMS (ESI) calcd. for  $C_{32}H_{26}BrN_3O_4$   $[M+H]^+$ : 596.118; found 596.1233.

**(3S,3'R,4'S,5'S)-5'-benzyl-4'-(4-chlorophenyl)-5-methyl-3'-(4-nitrobenzoyl)spiro[indoline-3,2'-pyrrolidin]-2-one (24c):**

The product was synthesized utilizing the microwave-irradiated approach, and purified by column chromatography over silica gel using hexane/EtOAc (7:3) as an eluent; Physical Appearance: dark yellow solid; Yield: 88%;  $R_f$  (EtOAc/hexane: 1:1) = 0.47 ; m.p. 135-137 °C;  $[\alpha]^{20} = -14.12^\circ$ ; FT-IR (KBr,  $\nu$  max/cm<sup>-1</sup>) 3742.96, 3618.41, 2919.80, 2852.32, 2361.15, 1695.04, 1522.46, 1341.81, 1088.83, 968.72, 817.89, 691.96; <sup>1</sup>H NMR (400 MHz, CDCl<sub>3</sub>)  $\delta$  7.97 (d,  $J$  = 8.4 Hz, 2H), 7.54 (s, 1H), 7.45 – 7.42 (m, 3H), 7.31 – 7.15 (m, 5H), 7.24 – 7.14 (m, 4H), 6.76 (d,  $J$  = 6.8 Hz, 1H), 6.52 (s, 1H), 6.26 – 6.22 (m, 1H), 4.50 (d,  $J$  = 10.4 Hz, 1H), 4.27 – 4.22 (m, 1H), 3.84 – 3.78 (m, 1H), 2.98 – 2.94 (m, 1H), 2.74 – 2.68 (m, 1H), 2.19 (s, 3H); <sup>13</sup>C NMR (100 MHz, CDCl<sub>3</sub>)  $\delta$  195.97, 181.21, 149.91, 141.57, 141.33, 137.48, 137.13, 134.79, 133.09, 130.28, 129.97, 129.62, 128.76, 128.62, 128.59, 127.68, 126.87, 126.72, 126.30, 123.32, 109.20, 68.47, 64.70, 64.15, 52.06, 38.66, 21.01; HRMS (ESI) calcd. for  $C_{32}H_{26}ClN_3O_4$   $[M+H]^+$ : 552.1685; found 552.1700.

**(3S,3'R,4'S,5'S)-5'-benzyl-4'-(4-chlorophenyl)-3'-(4-fluorobenzoyl)spiro[indoline-3,2'-pyrrolidin]-2-one (24d):**

The product was synthesized utilizing the microwave-irradiated approach, and purified by column chromatography over silica gel using hexane/EtOAc (7:3) as an eluent; Physical Appearance: light orange solid; Yield: 97%;  $R_f$  (EtOAc/hexane: 1:1) = 0.47; m.p. 104-106 °C;  $[\alpha]^{20} = +14.10^\circ$ ; FT-IR (KBr,  $\nu$  max/cm<sup>-1</sup>) 3738.13, 3223.12, 2922.72, 2358.43, 1708.79, 1476.71, 1238.52, 984.20, 744.78, 690.39; <sup>1</sup>H NMR (400 MHz, CDCl<sub>3</sub>)  $\delta$  7.49 – 7.30 (m, 7H), 7.23 – 7.13 (m, 6H), 6.99 – 6.95 (m, 1H), 6.87 – 6.80 (m, 4H), 6.41 (d,  $J$  = 7.6 Hz, 1H), 4.45 (d,  $J$  = 10.8 Hz, 1H), 4.24 – 4.19 (m, 1H), 3.85 – 3.80 (m, 1H), 2.97 – 2.93 (m, 1H), 2.71 – 2.66 (m, 1H); <sup>13</sup>C NMR (100 MHz, CDCl<sub>3</sub>)  $\delta$  195.49, 181.59, 166.79, 164.25, 139.64, 137.97, 137.71, 133.51, 133.00, 130.26, 129.99, 129.64, 129.21, 129.09, 128.58, 126.63, 125.71, 123.21, 115.47, 115.26, 109.35, 68.63, 64.72, 63.53, 52.08, 38.87; HRMS (ESI) calcd. for  $C_{31}H_{24}ClFN_2O_2$   $[M+H]^+$ : 511.1583; found 511.1783.

**(3S,3'R,4'S,5'S)-5'-benzyl-7-bromo-4'-(4-chlorophenyl)-3'-(4-nitrobenzoyl)spiro[indoline-3,2'-pyrrolidin]-2-one (24e):**

The product was synthesized utilizing the microwave-irradiated approach, and purified by column chromatography over silica gel using hexane/EtOAc (7:3) as an eluent; Physical Appearance: light orange solid; Yield: 83 %;  $R_f$  (EtOAc/hexane: 1:1) = 0.46; m.p. 166-168 °C;  $[\alpha]^{20} = -8.31^\circ$ ; FT-IR (KBr,  $\nu$  max/cm<sup>-1</sup>) 3842.02, 3742.16, 3618.21, 2973.16, 2923.30, 2359.76, 1701.34, 1517.86, 1339.19, 1172.08, 957.65, 743.66, 685.17; <sup>1</sup>H NMR (400 MHz, CDCl<sub>3</sub>)  $\delta$  8.01 (d,  $J$  = 8.8 Hz, 2H), 7.51 (s, 1H), 7.44 – 7.39 (m, 3H), 7.32 – 7.26 (m, 4H), 7.23 – 7.09 (m, 6H), 6.80 – 6.73 (m, 2H), 4.48 (d,  $J$  = 10.8 Hz, 1H), 4.29 – 4.24 (m, 1H), 3.80 – 3.75 (m, 1H), 2.97 – 2.93 (m, 1H), 2.70 – 2.64 (m, 1H); <sup>13</sup>C NMR (100 MHz, CDCl<sub>3</sub>)  $\delta$  195.73, 180.18, 150.07, 141.27, 140.89, 139.05, 137.59, 134.87, 132.08, 130.55, 130.34, 129.46, 128.61, 127.82, 126.81, 124.59, 123.37, 102.71, 69.59, 64.68, 51.77, 39.03; HRMS (ESI) calcd. for  $C_{31}H_{23}BrClN_3O_4$   $[M+H]^+$ : 616.0633; found 616.0640 .

**(3*S*,3'*R*,4'*S*,5'*S*)-5'-benzyl-4'-(4-bromophenyl)-5-iodo-3'-(4-methylbenzoyl)spiro[indoline-3,2'-**

**pyrrolidin]-2-one (24f):** The product was synthesized utilizing the microwave-irradiated approach, and purified by column chromatography over silica gel using hexane/EtOAc (7:3) as an eluent; Physical Appearance: light yellow solid; Yield: 98 %;  $R_f$ (EtOAc/hexane: 1:1) = 0.45; m.p. 101-102 °C;  $[\alpha]^{20} = -12.11^\circ$ ; FT-IR (KBr,  $\nu_{\max}/\text{cm}^{-1}$ ) 3843.17, 3738.64, 2922.18, 2359.25, 1704.53, 1464.69, 1177.66, 961.68, 815.11, 689.50;  $^1\text{H}$  NMR (400 MHz,  $\text{CDCl}_3$ )  $\delta$  7.46 – 7.39 (m, 5H), 7.28 – 7.08 (m, 11H), 6.94 (d,  $J = 8$  Hz, 2H), 6.17 (d,  $J = 7.6$  Hz, 1H), 4.46 (d,  $J = 10.8$  Hz, 1H), 4.22 – 4.16 (m, 1H), 3.84 – 3.78 (m, 1H), 2.95 – 2.91 (m, 1H), 2.69 – 2.64 (m, 1H), 2.23 (s, 3H);  $^{13}\text{C}$  NMR (100 MHz,  $\text{CDCl}_3$ )  $\delta$  196.16, 181.09, 144.00, 139.34, 138.40, 137.92, 134.65, 132.04, 130.40, 129.48, 129.05, 128.60, 127.84, 126.82, 121.11, 111.26, 85.46, 64.78, 63.07, 51.95, 38.98, 21.64; HRMS (ESI) calcd. for  $\text{C}_{32}\text{H}_{26}\text{BrIN}_2\text{O}_2$   $[\text{M}+\text{H}]^+$ : 677.0295; found 677.0294.

**(3*S*,3'*R*,4'*S*,5'*S*)-5'-((1*H*-indol-2-yl)methyl)-5-bromo-3'-(4-fluorobenzoyl)-4'-(4-methoxyphenyl)spiro**

**[indoline-3,2'-pyrrolidin]-2-one (25a):** The product was synthesized utilizing the microwave-irradiated approach, and purified by column chromatography over silica gel using hexane/EtOAc (7:3) as an eluent; Physical Appearance: light brown solid; Yield: 91%;  $R_f$ (EtOAc/hexane: 6:4) = 0.43; m.p. 154-156 °C;  $[\alpha]^{20} = +3.22^\circ$ ; FT-IR (KBr,  $\nu_{\max}/\text{cm}^{-1}$ ) 3740.66, 3362.57, 2924.26, 2852.77, 2357.55, 1706.96, 1602.62, 1510.66, 1462.94, 1241.10, 1178.84, 1095.50, 815.64, 739.36, 638.87;  $^1\text{H}$  NMR (400 MHz,  $\text{CDCl}_3$ )  $\delta$  8.12 (s, 1H), 7.68 (s, 1H), 7.47 – 7.36 (m, 6H), 7.31 (d,  $J = 8.0$  Hz, 1H), 7.15 – 7.12 (m, 1H), 7.05 – 7.02 (m, 3H), 6.89 (d,  $J = 8.8$  Hz, 2H), 6.83 – 6.78 (m, 3H), 6.20 (d,  $J = 8.4$  Hz, 1H), 4.48 (d,  $J = 10.8$  Hz, 1H), 4.28 – 4.23 (m, 1H), 3.88 – 3.83 (m, 1H), 3.78 (s, 3H), 3.14 – 3.10 (m, 1H), 2.84 – 2.78 (m, 1H);  $^{13}\text{C}$  NMR (100 MHz,  $\text{CDCl}_3$ )  $\delta$  195.55, 181.47, 166.78, 164.25, 158.81, 138.68, 136.24, 133.71, 131.97, 131.83, 131.17, 130.42, 130.32, 129.61, 128.91, 127.88, 122.83, 122.19, 119.59, 118.98, 115.52, 115.30, 114.34, 112.14, 111.34, 110.78, 68.83, 64.75, 63.58, 55.34, 51.95, 28; HRMS (ESI) calcd. for  $\text{C}_{34}\text{H}_{27}\text{BrFN}_3\text{O}_3$   $[\text{M}+\text{H}]^+$ : 624.1293; found 624.1294.

**(3*S*,3'*R*,4'*S*,5'*S*)-5'-((1*H*-indol-2-yl)methyl)-3'-(4-bromobenzoyl)-4'-(4-methoxyphenyl)spiro[indoline-**

**3,2'-pyrrolidin]-2-one (25b):** The product was synthesized utilizing the microwave-irradiated approach, and purified by column chromatography over silica gel using hexane/EtOAc (7:3) as an eluent; Physical Appearance: light brown solid; Yield: 75%;  $R_f$ (EtOAc/hexane: 6:4) = 0.47; m.p. 118-120 °C;  $[\alpha]^{20} = +4.27^\circ$ ; FT-IR (KBr,  $\nu_{\max}/\text{cm}^{-1}$ ) 3739.37, 3350.15, 2924.66, 2358.94, 1710.54, 1615.64. 1510.92, 1465.00, 1334.73, 1243.36, 1178.13, 1071.73, 998.85, 830.41, 740.30;  $^1\text{H}$  NMR (400 MHz,  $\text{CDCl}_3$ )  $\delta$  8.09 (s, 1H), 7.48 – 7.45 (m, 4H), 7.30 – 7.11 (m, 9H), 6.94 – 6.88 (m, 3H), 6.81 – 6.75 (m, 2H), 6.36 (d,  $J = 8$  Hz, 1H), 4.49 (d,  $J = 10.8$  Hz, 1H), 4.30 – 4.25 (m, 1H), 3.88 – 3.83 (m, 1H), 3.78 (s, 3H), 3.16 – 3.12 (m, 1H), 2.86 – 2.81 (m, 1H);  $^{13}\text{C}$  NMR (100 MHz,  $\text{CDCl}_3$ )  $\delta$  196.61, 181.69, 158.74, 139.70, 136.24, 136.02, 131.46, 131.42, 129.61, 129.49, 129.21, 129.15, 127.97, 127.93, 125.63, 123.06, 122.86, 122.11, 119.51,

119.11, 114.29, 112.16, 111.10, 109.36, 68.82, 64.70, 63.84, 55.34, 52.35, 27.99; HRMS (ESI) calcd. for  $C_{34}H_{28}BrN_3O_3$   $[M+H]^+$ : 606.1387; found 606.1381.

**(3*S*,3'*R*,4'*S*,5'*S*)-5'-((1*H*-indol-2-yl)methyl)-5-bromo-4'-(4-chlorophenyl)-3'-(4-fluorobenzoyl)spiro**

**[indoline-3,2'-pyrrolidin]-2-one (25c):** The product was synthesized utilizing the microwave-irradiated approach, and purified by column chromatography over silica gel using hexane/EtOAc (7:3) as an eluent; Physical Appearance: dark orange solid; Yield: 71%;  $R_f$  (EtOAc/hexane: 1:1) = 0.47; m.p. 138-140 °C;  $[\alpha]^{20} = -8.65^\circ$ ; FT-IR (KBr,  $\nu$  max/cm<sup>-1</sup>) 3744.85, 2925.84, 2858.05, 2362.33, 1714.67, 1597.61, 1468.52, 1421.12, 1232.15, 1089.95, 1008.23, 814.04, 738.90; <sup>1</sup>H NMR (400 MHz, CDCl<sub>3</sub>)  $\delta$  8.09 (s, 1H), 7.57 (s, 1H), 7.48 – 7.24 (m, 9H), 7.17 – 7.13 (m, 1H), 7.06 – 7.03 (m, 3H), 6.84 – 6.80 (m, 3H), 6.23 (d,  $J$  = 8 Hz, 1H), 4.45 (d,  $J$  = 10.8 Hz, 1H), 4.31 – 4.26 (m, 1H), 3.87 (t,  $J$  = 10.8 Hz, 1H), 3.12 – 3.07 (m, 1H), 2.86 – 2.81 (m, 1H); <sup>13</sup>C NMR (100 MHz, CDCl<sub>3</sub>)  $\delta$  195.24, 181.27, 138.62, 137.86, 136.24, 133.52, 133.06, 132.11, 131.56, 130.41, 130.31, 130.00, 129.05, 128.92, 127.78, 122.80, 122.28, 119.66, 118.91, 115.64, 115.61, 115.39, 111.90, 111.36, 110.81, 68.77, 64.65, 63.62, 52.00, 28.15; HRMS (ESI) calcd. for  $C_{33}H_{24}BrClFN_3O_2$   $[M+H]^+$ : 628.0797; found 628.0800.

**(3*S*,3'*R*,4'*S*,5'*S*)-5'-((1*H*-indol-2-yl)methyl)-4'-(4-bromophenyl)-3'-(4-cyclohexylbenzoyl)-5-fluoro**

**spiro[indoline-3,2'-pyrrolidin]-2-one (25d):** The product was synthesized utilizing the microwave-irradiated approach, and purified by column chromatography over silica gel using hexane/EtOAc (7:3) as an eluent; Physical Appearance: orange brown solid; Yield: 73%;  $[\alpha]^{20} = -6.72^\circ$ ;  $R_f$  (EtOAc/hexane: 6:4) = 0.49; m.p. 112-114 °C; FT-IR (KBr,  $\nu$  max/cm<sup>-1</sup>) 3737.58, 2921.02, 2852.01, 2356.89, 1709.66, 1604.32, 1481.52, 1180.27, 1004.28, 814.57, 737.49; <sup>1</sup>H NMR (400 MHz, CDCl<sub>3</sub>)  $\delta$  8.09 (s, 1H), 7.53 – 7.41 (m, 6H), 7.32 – 7.28 (m, 3H), 7.15 – 7.11 (m, 1H), 7.05 – 6.95 (m, 4H), 6.62 – 6.52 (m, 2H), 6.25 – 6.22 (m, 1H), 4.50 (d,  $J$  = 10.8 Hz, 1H), 4.33 – 4.27 (m, 1H), 3.90 – 3.85 (m, 1H), 3.11 – 3.07 (m, 1H), 2.87 – 2.81 (m, 1H), 2.39 – 2.33 (m, 1H), 2.03 – 1.66 (m, 10H); <sup>13</sup>C NMR (100 MHz, CDCl<sub>3</sub>)  $\delta$  196.40, 181.87, 160.32, 157.91, 153.88, 138.71, 136.26, 135.62, 134.81, 131.89, 131.29, 131.22, 130.41, 127.95, 127.83, 126.79, 122.78, 122.20, 120.99, 119.57, 118.98, 115.65, 115.41, 113.80, 113.55, 112.03, 111.22, 109.83, 109.75, 69.17, 64.60, 63.36, 52.35, 44.54, 34.03, 29.77, 28.25, 26.66, 26.00, 22.73, 14.20; HRMS (ESI) calcd. for  $C_{39}H_{35}BrFN_3O_2$   $[M+H]^+$ : 676.1970; found 676.1978.

**(3*S*,3'*R*,4'*S*,5'*S*)-5'-((1*H*-indol-2-yl)methyl)-3'-(4-fluorobenzoyl)-4'-(4-methoxyphenyl)-5-methylspiro**

**[indoline-3,2'-pyrrolidin]-2-one (25e):** The product was synthesized utilizing the microwave-irradiated approach, and purified by column chromatography over silica gel using hexane/EtOAc (7:3) as an eluent; Physical Appearance: light brown solid; Yield: 87%;  $R_f$  (EtOAc/hexane: 1:1) = 0.41; m.p. 103-105 °C;  $[\alpha]^{20} = -6.38^\circ$ ; FT-IR (KBr,  $\nu$  max/cm<sup>-1</sup>) 3738.02, 3615.96, 2922.43, 2853.52, 2357.16, 1710.90, 1599.16, 1508.54, 1238.76, 1031.57, 816.77, 741.91; <sup>1</sup>H NMR (400 MHz, CDCl<sub>3</sub>)  $\delta$  8.06 (s, 1H), 7.48 (d,  $J$  = 8.8 Hz, 3H), 7.37 – 7.31 (m, 3H), 7.18 – 7.12 (m, 4H), 7.06 – 7.01 (m, 2H), 6.88 (d,  $J$  = 8.8 Hz, 2H), 6.81 – 6.77 (m, 2H), 6.70 (d,  $J$  = 8.4 Hz, 1H), 6.47 (s, 1H), 6.23 (d,  $J$  = 8 Hz, 1H), 4.51 – 4.48 (d,  $J$  = 10.8 Hz, 1H), 4.29 – 4.24 (m, 1H), 3.89 – 3.84 (m, 1H), 3.78 (s, 3H), 3.17 – 3.13 (m, 1H), 2.88 – 2.83 (m, 1H), 2.11

(s, 3H).;  $^{13}\text{C}$  NMR (100 MHz,  $\text{CDCl}_3$ )  $\delta$  195.93, 181.67, 166.66, 158.7, 137.09, 136.25, 133.81, 132.61, 131.54, 130.35, 130.26, 129.63, 129.39, 128.03, 126.24, 123.00, 122.12, 119.56, 119.14, 115.32, 115.11, 114.26, 112.11, 111.07, 108.87, 68.98, 64.66, 63.82, 55.33, 52.11, 27.80, 20.96; HRMS (ESI) calcd. for  $\text{C}_{35}\text{H}_{30}\text{FN}_3\text{O}_3$   $[\text{M}+\text{H}]^+$ : 560.2344; found 560.2345.

**(3*S*,3'*R*,4'*S*,5'*S*)-5'-((1*H*-indol-2-yl)methyl)-4'-(4-chlorophenyl)-3'-(4-fluorobenzoyl)-5-nitrospiro**

**[indoline-3,2'-pyrrolidin]-2-one (25f):** The product was synthesized utilizing the microwave-irradiated approach, and purified by column chromatography over silica gel using hexane/EtOAc (7:3) as an eluent; Physical Appearance: off white solid; Yield: 72%;  $R_f$ (EtOAc/hexane: 1:1) = 0.49; m.p. 172-174 °C;  $[\alpha]^{20} = +8.92^\circ$ ; FT-IR (KBr,  $\nu$  max/ $\text{cm}^{-1}$ ) 3737.36, 3615.92, 2925.29, 2856.15, 2357.07, 1708.55, 1517.21, 1334.45, 1192.41, 1097.14, 964.81, 830.23, 744.18;  $^1\text{H}$  NMR (400 MHz, DMSO)  $\delta$  10.96 (s, 1H), 10.73 (s, 1H), 8.27 (s, 1H), 7.90 – 7.88 (m, 1H), 7.74 (d,  $J = 2$  Hz, 1H), 7.47 (d,  $J = 8.8$  Hz, 2H), 7.39 – 7.34 (m, 3H), 7.26 – 7.20 (m, 2H), 7.06 – 6.95 (m, 4H), 6.88 – 6.84 (m, 1H), 6.56 (d,  $J = 8.4$  Hz, 1H), 4.46 (d,  $J = 10.4$  Hz, 1H), 4.07 (s, 1H), 3.84 – 3.79 (m, 1H), 3.65 (d,  $J = 7.2$  Hz, 1H), 2.86 – 2.76 (m, 2H);  $^{13}\text{C}$  NMR (100 MHz, DMSO)  $\delta$  196.29, 182.28, 148.66, 142.33, 139.39, 136.62, 133.79, 131.99, 130.84, 130.75, 130.65, 129.13, 127.77, 126.57, 123.85, 121.83, 121.24, 118.64, 118.61, 116.22, 116.00, 111.89, 111.81, 109.74, 79.70, 68.39, 65.33, 63.35, 52.82, 28.80; HRMS (ESI) calcd. for  $\text{C}_{33}\text{H}_{24}\text{ClFN}_4\text{O}_4$   $[\text{M}+\text{H}]^+$ : 595.1543; found 595.1598.

**(3*S*,3'*R*,4'*S*,5'*S*)-5'-((1*H*-indol-2-yl)methyl)-4'-(4-chlorophenyl)-3'-(4-fluorobenzoyl)-5-methoxyspiro**

**[indoline-3,2'-pyrrolidin]-2-one (25g):** The product was synthesized utilizing the microwave-irradiated approach, and purified by column chromatography over silica gel using hexane/EtOAc (7:3) as an eluent; Physical Appearance: light brown solid; Yield: 81%;  $R_f$ (EtOAc/hexane: 1:1) = 0.43; m.p. 142-145 °C;  $[\alpha]^{20} = -7.74^\circ$ ; FT-IR (KBr,  $\nu$  max/ $\text{cm}^{-1}$ ) 3844.59, 3737.95, 3281.29, 2920.36, 2851.62, 2357.87, 1728.18, 1598.43, 1486.63, 1301.36, 1091.64, 1028.63, 949.87, 813.72, 735.76;  $^1\text{H}$  NMR (400 MHz,  $\text{CDCl}_3$ )  $\delta$  8.10 (s, 1H), 7.53 – 7.46 (m, 4H), 7.39 – 7.36 (m, 2H), 7.31 – 7.29 (m, 3H), 7.16 – 7.01 (m, 4H), 6.82 – 6.78 (m, 2H), 6.48 – 6.45 (m, 1H), 6.34 – 6.27 (m, 2H), 4.46 (d,  $J = 10.8$  Hz, 1H), 4.33 – 4.28 (m, 1H), 3.90 – 3.84 (m, 1H), 3.58 (s, 3H), 3.13 – 3.09 (m, 1H), 2.89 – 2.83 (m, 1H);  $^{13}\text{C}$  NMR (100 MHz,  $\text{CDCl}_3$ )  $\delta$  195.56, 181.85, 166.79, 164.25, 156.12, 138.23, 136.26, 133.55, 133.52, 133.03, 132.91, 130.39, 130.34, 130.25, 130.03, 128.99, 127.89, 123.00, 122.19, 119.61, 119.07, 115.47, 115.25, 114.99, 69.30, 64.56, 63.82, 55.90, 52.25, 22.74; HRMS (ESI) calcd. for  $\text{C}_{34}\text{H}_{27}\text{ClFN}_3\text{O}_3$   $[\text{M}+\text{H}]^+$ : 580.1798; found 580.1849.

## II. X-ray Crystallography

Single crystals of  $\text{C}_{27}\text{H}_{23}\text{BrN}_2\text{O}_2$  of spirooxindole **23f** were picked up from the mother liquor of DCM which was kept for crystallization using the slow evaporation method at low temperature. A suitable crystal was selected and mounted on Oxford Diffraction diffractometer. The crystal was kept at 293(2) K during data collection. Using Olex2, the structure was solved with the ShelxT structure solution program using Intrinsic Phasing method and refined with the refinement package using minimization.

**Crystal Data** for  $C_{27}H_{23}BrN_2O_2$  ( $M = 486.09$  g/mol): trigonal, space group R-3 (no. 148),  $a = 22.6902(11)$  Å,  $c = 25.8577(11)$  Å,  $V = 11529.1(12)$  Å<sup>3</sup>,  $Z = 107$ ,  $T = 293(2)$  K,  $\mu(\text{MoK}\alpha) = 1.637$  mm<sup>-1</sup>,  $D_{\text{calc}} = 1.419$  g/cm<sup>3</sup>, 46600 reflections measured ( $7.814^\circ \leq 2\theta \leq 49.99^\circ$ ), 4512 unique ( $R_{\text{int}} = 0.0710$ ,  $R_{\text{sigma}} = 0.0424$ ) which were used in all calculations. The final  $R_1$  was 0.0927 ( $I > 2\sigma(I)$ ) and  $wR_2$  was 0.2201 (all data). The determination of unit cell and intensity data collection was performed using Oxford Diffraction diffractometer at 293(2) K. The crystallographic data (excluding structure factors) for the structures in this manuscript have been deposited with the Cambridge Crystallographic Data Centre as supplementary publication no. CCDC 2070443. Copies of the data can be obtained, without any charge, upon application to CCDC, 12 Union Road, Cambridge CB2 1EZ, UK (fax: + 44 1223 336033 or email: deposit@ccdc.cam.ac.uk).

## Refinement model description

Details:

1. Fixed Uiso

At 1.2 times of:

All C(H) groups, All C(H,H) groups, All N(H) groups

2.a Ternary CH refined with riding coordinates:

C007(H007), C009(H009), C00I(H00I)

2.b Secondary CH<sub>2</sub> refined with riding coordinates:

C00J(H00a,H00b), C00O(H00d,H00f), C00P(H00g,H00j)

2.c Aromatic/amide H refined with riding coordinates:

N004(H004), C00C(H00C), C00E(H00E), C00H(H00H), C00K(H00K), C00L(H00L),  
C00M(H00M), C00Q(H00Q), C00R(H00R), C00S(H00S), C00T(H00T), C00U(H00U),  
C00V(H00V), C00W(H00W)

**Table S1.** Crystallographic parameters of the spirooxindole **23f**.

| <i>Identification code</i>        | <b>spirooxindole 16</b> |
|-----------------------------------|-------------------------|
| <i>CCDC No.</i>                   | 198676                  |
| <i>Empirical formula</i>          | $C_{27}H_{23}BrN_2O_2$  |
| <i>Formula weight</i>             | 486.0943                |
| <i>Temperature/K</i>              | 293(2)                  |
| <i>Crystal system</i>             | trigonal                |
| <i>Space group</i>                | R-3                     |
| <i>a/Å</i>                        | 22.6902(11)             |
| <i>b/Å</i>                        | 22.6902(11)             |
| <i>c/Å</i>                        | 25.8577(11)             |
| <i><math>\alpha/^\circ</math></i> | 90                      |
| <i><math>\beta/^\circ</math></i>  | 90                      |

|                                               |                                                               |
|-----------------------------------------------|---------------------------------------------------------------|
| $\gamma/^\circ$                               | 120                                                           |
| Volume/ $\text{\AA}^3$                        | 11529.1(12)                                                   |
| Z                                             | 107                                                           |
| $\rho_{\text{calc}}/\text{g/cm}^3$            | 1.419                                                         |
| $\mu/\text{mm}^{-1}$                          | 1.637                                                         |
| $F(000)$                                      | 5040.0                                                        |
| Crystal size/ $\text{mm}^3$                   | $0.5 \times 0.5 \times 0.5$                                   |
| Radiation                                     | MoK $\alpha$ ( $\lambda = 0.71073$ )                          |
| $2\theta$ range for data collection/ $^\circ$ | 7.814 to 49.99                                                |
| Index ranges                                  | $-26 \leq h \leq 26, -26 \leq k \leq 26, -30 \leq l \leq 30$  |
| Reflections collected                         | 46600                                                         |
| Independent reflections                       | 4512 [ $R_{\text{int}} = 0.0710, R_{\text{sigma}} = 0.0424$ ] |
| Data/restraints/parameters                    | 4512/0/334                                                    |
| Goodness-of-fit on $F^2$                      | 1.390                                                         |
| Final R indexes [ $I \geq 2\sigma(I)$ ]       | $R_I = 0.0927, wR_2 = 0.2075$                                 |
| Final R indexes [all data]                    | $R_I = 0.1210, wR_2 = 0.2201$                                 |
| Largest diff. peak/hole / $e \text{\AA}^{-3}$ | 0.47/-0.34                                                    |

**Table S2** Fractional Atomic Coordinates ( $\times 10^4$ ) and Equivalent Isotropic Displacement Parameters ( $\text{\AA}^2 \times 10^3$ ) for spirooxindole **23f**.  $U_{\text{eq}}$  is defined as 1/3 of the trace of the orthogonalised  $U_{\text{ij}}$  tensor.

| Atom | x          | y          | z          | U(eq)    |
|------|------------|------------|------------|----------|
| Br01 | 4990.8(4)  | 4161.1(4)  | 6011.4(2)  | 74.7(4)  |
| O002 | 4548.2(19) | 3272.5(17) | 3124.7(12) | 46.8(9)  |
| O003 | 3286.9(19) | 3567.0(19) | 4530.6(14) | 48.5(9)  |
| N004 | 5175(2)    | 4132.2(18) | 3694.8(15) | 32.7(9)  |
| N005 | 4291.2(19) | 2462.1(18) | 4074.0(16) | 32.9(9)  |
| C006 | 5199(2)    | 4220(2)    | 4241.6(18) | 28.7(10) |
| C007 | 3202(2)    | 2252(2)    | 4361.7(18) | 32.5(11) |
| C008 | 4679(2)    | 3642(2)    | 4470.9(17) | 29.3(10) |
| C009 | 3524(2)    | 2865(2)    | 3995.3(17) | 30.4(11) |
| C00A | 4284(2)    | 3110(2)    | 4052.6(16) | 27.6(10) |
| C00B | 4679(2)    | 3501(2)    | 3559.8(18) | 31.6(11) |
| C00C | 4603(3)    | 3621(3)    | 5000.2(19) | 36.3(12) |
| C00D | 3309(2)    | 3388(2)    | 4091(2)    | 33.3(11) |
| C00E | 5584(3)    | 4753(3)    | 5048(2)    | 45.2(14) |
| C00F | 5065(3)    | 4178(3)    | 5282(2)    | 40.9(13) |
| C00G | 2437(2)    | 1829(2)    | 4339.7(19) | 35.9(12) |
| C00H | 5661(3)    | 4773(3)    | 4520(2)    | 39.9(12) |

|      |          |          |          |          |
|------|----------|----------|----------|----------|
| C00I | 3604(2)  | 1899(2)  | 4225(2)  | 39.5(12) |
| C00J | 4799(3)  | 2417(3)  | 4405(2)  | 43.6(13) |
| C00K | 2046(3)  | 1962(3)  | 4680(2)  | 44.4(13) |
| C00L | 2099(3)  | 1302(3)  | 3990(2)  | 55.2(16) |
| C00M | 1351(3)  | 1599(3)  | 4669(3)  | 60.4(18) |
| C00N | 3103(3)  | 3660(3)  | 3651(2)  | 51.7(15) |
| C00O | 4424(3)  | 2000(3)  | 4868(2)  | 53.5(15) |
| C00P | 3718(3)  | 1505(3)  | 4644(3)  | 64.9(18) |
| C00Q | 1015(3)  | 1083(4)  | 4322(3)  | 66.3(19) |
| C00R | 1395(4)  | 936(4)   | 3981(3)  | 74(2)    |
| C00S | 3234(4)  | 3579(4)  | 3136(3)  | 73(2)    |
| C00T | 2768(6)  | 4012(5)  | 3751(4)  | 109(3)   |
| C00U | 3015(6)  | 3833(5)  | 2735(3)  | 106(3)   |
| C00V | 2696(7)  | 4182(6)  | 2852(5)  | 135(4)   |
| C00W | 2541(9)  | 4250(7)  | 3342(6)  | 164(6)   |
| C5   | 5986(19) | 3220(20) | 5720(20) | 303(17)  |
| C6   | 6086(16) | 2608(12) | 5705(16) | 283(14)  |
| C2   | 6401(8)  | 3479(10) | 3800(7)  | 177(6)   |
| C4   | 6041(10) | 2690(13) | 3284(11) | 226(8)   |
| C7   | 6219(15) | 3100(20) | 6132(13) | 307(11)  |

**Table S3** Anisotropic Displacement Parameters ( $\text{\AA}^2 \times 10^3$ ) for spirooxindole **23f**. The Anisotropic displacement factor exponent takes the form:  $-2\pi^2[h^2a^{*2}U_{11}+2hka^*b^*U_{12}+\dots]$ .

| Atom | U <sub>11</sub> | U <sub>22</sub> | U <sub>33</sub> | U <sub>23</sub> | U <sub>13</sub> | U <sub>12</sub> |
|------|-----------------|-----------------|-----------------|-----------------|-----------------|-----------------|
| Br01 | 83.9(6)         | 98.6(6)         | 32.6(4)         | -11.9(3)        | -2.3(3)         | 38.7(4)         |
| O002 | 56(2)           | 40(2)           | 26.2(19)        | -2.5(16)        | 10.4(16)        | 10.7(18)        |
| O003 | 57(2)           | 54(2)           | 44(2)           | -15.9(18)       | 1.3(18)         | 34(2)           |
| N004 | 36(2)           | 22(2)           | 30(2)           | 4.9(16)         | 10.0(17)        | 6.9(19)         |
| N005 | 29(2)           | 23(2)           | 44(2)           | 3.1(17)         | 4.9(18)         | 11.0(17)        |
| C006 | 27(2)           | 27(2)           | 32(2)           | -3(2)           | 5(2)            | 13(2)           |
| C007 | 33(3)           | 27(2)           | 29(2)           | -1(2)           | 0(2)            | 9(2)            |
| C008 | 33(3)           | 26(2)           | 29(2)           | -2.0(19)        | 4(2)            | 15(2)           |
| C009 | 34(3)           | 23(2)           | 27(2)           | -0.1(19)        | 4(2)            | 9(2)            |

|      |         |         |         |          |          |         |
|------|---------|---------|---------|----------|----------|---------|
| C00A | 34(3)   | 21(2)   | 23(2)   | -2.7(18) | 4.3(19)  | 10(2)   |
| C00B | 34(3)   | 35(3)   | 28(3)   | 0(2)     | 5(2)     | 19(2)   |
| C00C | 35(3)   | 35(3)   | 34(3)   | 0(2)     | 1(2)     | 14(2)   |
| C00D | 32(3)   | 23(2)   | 42(3)   | -1(2)    | 4(2)     | 11(2)   |
| C00E | 36(3)   | 47(3)   | 47(3)   | -22(3)   | -7(2)    | 16(3)   |
| C00F | 44(3)   | 52(3)   | 30(3)   | -8(2)    | 1(2)     | 27(3)   |
| C00G | 35(3)   | 34(3)   | 33(3)   | 15(2)    | 5(2)     | 13(2)   |
| C00H | 34(3)   | 31(3)   | 46(3)   | -5(2)    | 7(2)     | 10(2)   |
| C00I | 32(3)   | 28(3)   | 51(3)   | 4(2)     | 1(2)     | 10(2)   |
| C00J | 43(3)   | 36(3)   | 59(3)   | -2(3)    | -1(3)    | 25(3)   |
| C00K | 42(3)   | 42(3)   | 50(3)   | 5(3)     | 2(3)     | 22(3)   |
| C00L | 44(3)   | 57(4)   | 42(3)   | -5(3)    | 1(3)     | 8(3)    |
| C00M | 41(4)   | 62(4)   | 86(5)   | 25(4)    | 18(3)    | 32(3)   |
| C00N | 69(4)   | 44(3)   | 52(4)   | 5(3)     | -2(3)    | 36(3)   |
| C00O | 64(4)   | 60(4)   | 49(3)   | 19(3)    | 5(3)     | 40(3)   |
| C00P | 55(4)   | 49(4)   | 93(5)   | 38(3)    | 24(3)    | 27(3)   |
| C00Q | 34(3)   | 70(5)   | 89(5)   | 25(4)    | -5(4)    | 21(3)   |
| C00R | 56(4)   | 64(4)   | 67(4)   | -1(3)    | -20(4)   | 3(4)    |
| C00S | 101(6)  | 80(5)   | 55(4)   | 17(4)    | 3(4)     | 58(5)   |
| C00T | 166(9)  | 138(8)  | 88(6)   | -5(6)    | -7(6)    | 125(8)  |
| C00U | 159(9)  | 117(7)  | 72(5)   | 26(5)    | -8(5)    | 91(7)   |
| C00V | 201(12) | 155(10) | 116(9)  | 19(8)    | -32(9)   | 138(10) |
| C00W | 277(17) | 224(14) | 126(10) | -8(9)    | -43(10)  | 227(14) |
| C5   | 230(30) | 190(30) | 500(50) | 0(30)    | -120(30) | 110(30) |
| C6   | 200(30) | 180(20) | 480(40) | -90(30)  | -30(20)  | 98(19)  |
| C2   | 124(14) | 148(15) | 212(13) | 6(13)    | 57(11)   | 33(8)   |
| C4   | 127(15) | 240(20) | 295(19) | 24(17)   | -11(14)  | 82(10)  |
| C7   | 280(20) | 300(40) | 360(30) | 100(30)  | 105(19)  | 160(30) |

**Table S4** Bond Lengths for spirooxindole **23f**.

| Atom | Atom | Length/Å | Atom | Atom | Length/Å  |
|------|------|----------|------|------|-----------|
| Br01 | C00F | 1.893(5) | C00L | C00R | 1.384(9)  |
| O002 | C00B | 1.212(5) | C00M | C00Q | 1.366(10) |

|      |      |          |      |                 |           |
|------|------|----------|------|-----------------|-----------|
| O003 | C00D | 1.216(6) | C00N | C00S            | 1.398(9)  |
| N004 | C006 | 1.425(6) | C00N | C00T            | 1.375(10) |
| N004 | C00B | 1.351(6) | C00O | C00P            | 1.537(10) |
| N005 | C00A | 1.480(6) | C00Q | C00R            | 1.384(10) |
| N005 | C00I | 1.492(6) | C00S | C00U            | 1.393(10) |
| N005 | C00J | 1.480(6) | C00T | C00W            | 1.397(15) |
| C006 | C008 | 1.385(6) | C00U | C00V            | 1.347(14) |
| C006 | C00H | 1.369(7) | C00V | C00W            | 1.345(17) |
| C007 | C009 | 1.532(6) | C5   | C6 <sup>1</sup> | 1.42(3)   |
| C007 | C00G | 1.506(7) | C5   | C6              | 1.53(3)   |
| C007 | C00I | 1.528(7) | C5   | C7              | 1.29(3)   |
| C008 | C00A | 1.531(6) | C6   | C5 <sup>2</sup> | 1.42(3)   |
| C008 | C00C | 1.377(6) | C6   | C7              | 1.48(4)   |
| C009 | C00A | 1.532(7) | C6   | C7 <sup>2</sup> | 1.96(5)   |
| C009 | C00D | 1.511(7) | C2   | C2 <sup>1</sup> | 1.42(3)   |
| C00A | C00B | 1.555(6) | C2   | C2 <sup>2</sup> | 1.42(3)   |
| C00C | C00F | 1.379(7) | C2   | C4 <sup>3</sup> | 1.31(3)   |
| C00D | C00N | 1.478(8) | C2   | C4 <sup>1</sup> | 1.63(3)   |
| C00E | C00F | 1.385(8) | C4   | C2 <sup>2</sup> | 1.63(3)   |
| C00E | C00H | 1.376(7) | C4   | C2 <sup>4</sup> | 1.31(3)   |
| C00G | C00K | 1.385(7) | C4   | C4 <sup>3</sup> | 1.462(18) |
| C00G | C00L | 1.387(8) | C4   | C4 <sup>4</sup> | 1.462(18) |
| C00I | C00P | 1.507(8) | C7   | C6 <sup>1</sup> | 1.96(5)   |
| C00J | C00O | 1.499(8) | C7   | C7 <sup>2</sup> | 1.52(5)   |
| C00K | C00M | 1.367(8) | C7   | C7 <sup>1</sup> | 1.52(5)   |

<sup>1</sup>1+Y-X,1-X,+Z; <sup>2</sup>1-Y,+X-Y,+Z; <sup>3</sup>1/3+Y,2/3-X+Y,2/3-Z; <sup>4</sup>1/3-Y+X,-1/3+X,2/3-Z

**Table S5** Bond Angles for spirooxindole **23f**.

| Atom | Atom | Atom | Angle/°  | Atom | Atom | Atom | Angle/°  |
|------|------|------|----------|------|------|------|----------|
| C00B | N004 | C006 | 111.0(4) | C00S | C00N | C00D | 123.1(5) |
| C00A | N005 | C00I | 109.6(3) | C00T | C00N | C00D | 118.8(6) |
| C00J | N005 | C00A | 119.1(4) | C00T | C00N | C00S | 118.1(6) |
| C00J | N005 | C00I | 107.8(4) | C00J | C00O | C00P | 102.4(5) |
| C008 | C006 | N004 | 109.7(4) | C00I | C00P | C00O | 105.2(4) |

|      |      |      |          |                 |      |                 |           |
|------|------|------|----------|-----------------|------|-----------------|-----------|
| C00H | C006 | N004 | 127.4(4) | C00M            | C00Q | C00R            | 118.5(6)  |
| C00H | C006 | C008 | 122.9(4) | C00L            | C00R | C00Q            | 121.1(6)  |
| C00G | C007 | C009 | 115.5(4) | C00U            | C00S | C00N            | 120.7(7)  |
| C00I | C007 | C009 | 101.2(4) | C00N            | C00T | C00W            | 120.0(9)  |
| C00I | C007 | C00G | 117.2(4) | C00V            | C00U | C00S            | 119.1(9)  |
| C006 | C008 | C00A | 109.2(4) | C00W            | C00V | C00U            | 121.7(9)  |
| C00C | C008 | C006 | 119.4(4) | C00V            | C00W | C00T            | 120.1(10) |
| C00C | C008 | C00A | 131.4(4) | C6              | C5   | C6 <sup>1</sup> | 125(3)    |
| C007 | C009 | C00A | 102.2(4) | C7              | C5   | C6              | 63(2)     |
| C00D | C009 | C007 | 114.5(4) | C7              | C5   | C6 <sup>1</sup> | 93(3)     |
| C00D | C009 | C00A | 116.4(4) | C5              | C6   | C5 <sup>2</sup> | 115(3)    |
| N005 | C00A | C008 | 117.6(4) | C5              | C6   | C7 <sup>2</sup> | 88(2)     |
| N005 | C00A | C009 | 102.2(3) | C5 <sup>2</sup> | C6   | C7 <sup>2</sup> | 40.8(18)  |
| N005 | C00A | C00B | 107.9(3) | C7              | C6   | C5              | 50.5(19)  |
| C008 | C00A | C009 | 117.6(4) | C7              | C6   | C5 <sup>2</sup> | 90(3)     |
| C008 | C00A | C00B | 100.7(3) | C7              | C6   | C7 <sup>2</sup> | 50(3)     |
| C009 | C00A | C00B | 110.6(4) | C2 <sup>2</sup> | C2   | C2 <sup>1</sup> | 59.997(6) |
| O002 | C00B | N004 | 126.1(4) | C4 <sup>3</sup> | C2   | C2 <sup>2</sup> | 98(2)     |
| O002 | C00B | C00A | 124.6(4) | C4 <sup>1</sup> | C2   | C2 <sup>1</sup> | 83.9(15)  |
| N004 | C00B | C00A | 109.2(4) | C4 <sup>1</sup> | C2   | C2 <sup>2</sup> | 116.0(10) |
| C00F | C00C | C008 | 117.9(5) | C4 <sup>3</sup> | C2   | C2 <sup>1</sup> | 123.1(11) |
| O003 | C00D | C009 | 120.0(4) | C4 <sup>3</sup> | C2   | C4 <sup>1</sup> | 58.2(10)  |
| O003 | C00D | C00N | 120.2(4) | C2 <sup>4</sup> | C4   | C2 <sup>2</sup> | 119.5(19) |
| C00N | C00D | C009 | 119.7(4) | C2 <sup>4</sup> | C4   | C4 <sup>3</sup> | 72.0(19)  |
| C00H | C00E | C00F | 119.9(5) | C2 <sup>4</sup> | C4   | C4 <sup>4</sup> | 95(2)     |
| C00C | C00F | Br01 | 119.2(4) | C4 <sup>4</sup> | C4   | C2 <sup>2</sup> | 49.8(15)  |
| C00C | C00F | C00E | 122.2(5) | C4 <sup>3</sup> | C4   | C2 <sup>2</sup> | 83(2)     |
| C00E | C00F | Br01 | 118.6(4) | C4 <sup>3</sup> | C4   | C4 <sup>4</sup> | 117.0(13) |
| C00K | C00G | C007 | 119.7(5) | C5              | C7   | C6              | 66(2)     |
| C00K | C00G | C00L | 117.7(5) | C5              | C7   | C6 <sup>1</sup> | 46(2)     |
| C00L | C00G | C007 | 122.6(5) | C5              | C7   | C7 <sup>1</sup> | 94(3)     |
| C006 | C00H | C00E | 117.7(5) | C5              | C7   | C7 <sup>2</sup> | 121(3)    |
| N005 | C00I | C007 | 104.7(4) | C6              | C7   | C6 <sup>1</sup> | 98(3)     |

|      |      |      |          |                 |    |                 |            |
|------|------|------|----------|-----------------|----|-----------------|------------|
| N005 | C00I | C00P | 106.3(4) | C6              | C7 | C7 <sup>2</sup> | 81(3)      |
| C007 | C00I | C00P | 118.1(5) | C6              | C7 | C7 <sup>1</sup> | 119.4(17)  |
| N005 | C00J | C00O | 106.8(4) | C7 <sup>1</sup> | C7 | C6 <sup>1</sup> | 48(2)      |
| C00M | C00K | C00G | 121.8(6) | C7 <sup>2</sup> | C7 | C6 <sup>1</sup> | 95.5(19)   |
| C00R | C00L | C00G | 120.2(6) | C7 <sup>2</sup> | C7 | C7 <sup>1</sup> | 60.002(14) |
| C00K | C00M | C00Q | 120.7(6) |                 |    |                 |            |

<sup>1</sup>1+Y-X,1-X,+Z; <sup>2</sup>1-Y,+X-Y,+Z; <sup>3</sup>1/3+Y,2/3-X+Y,2/3-Z; <sup>4</sup>1/3-Y+X,-1/3+X,2/3-Z

**Table S6** Hydrogen Atom Coordinates (Å×10<sup>4</sup>) and Isotropic Displacement Parameters (Å<sup>2</sup>×10<sup>3</sup>) for spirooxindole **23f**.

| Atom | <i>x</i> | <i>y</i> | <i>z</i> | U(eq) |
|------|----------|----------|----------|-------|
| H004 | 5441     | 4439.61  | 3479.51  | 39    |
| H007 | 3326.13  | 2426.7   | 4715.25  | 39    |
| H009 | 3389.63  | 2693.76  | 3641.82  | 37    |
| H00C | 4252.31  | 3242.08  | 5162.88  | 44    |
| H00E | 5880.91  | 5124.64  | 5248.49  | 54    |
| H00H | 6015.06  | 5148.8   | 4356.76  | 48    |
| H00I | 3391.61  | 1600.36  | 3926.51  | 47    |
| H00A | 5149.97  | 2868.04  | 4511.19  | 52    |
| H00B | 5011.95  | 2201.89  | 4218.66  | 52    |
| H00K | 2262.72  | 2306.6   | 4923.52  | 53    |
| H00L | 2345.68  | 1193.89  | 3759.65  | 66    |
| H00M | 1103.36  | 1704.44  | 4900.32  | 73    |
| H00D | 4394.42  | 2281.45  | 5137.89  | 64    |
| H00F | 4640.68  | 1758.31  | 5006.45  | 64    |
| H00G | 3709.47  | 1104.91  | 4501.96  | 78    |
| H00J | 3370.7   | 1362.26  | 4908.96  | 78    |
| H00Q | 542.12   | 836.11   | 4313.71  | 80    |
| H00R | 1173.36  | 584.69   | 3743.43  | 89    |
| H00S | 3470.94  | 3353.01  | 3059.3   | 87    |
| H00T | 2693.07  | 4092.89  | 4090.74  | 131   |
| H00U | 3087.54  | 3762.82  | 2392.49  | 128   |
| H00V | 2580.17  | 4381.84  | 2586.07  | 162   |
| H00W | 2281.61  | 4454.38  | 3408.95  | 196   |

**$^1\text{H}$  NMR and  $^{13}\text{C}$  NMR Spectral Data of 23a-f, 24a-f and 25a-g.**

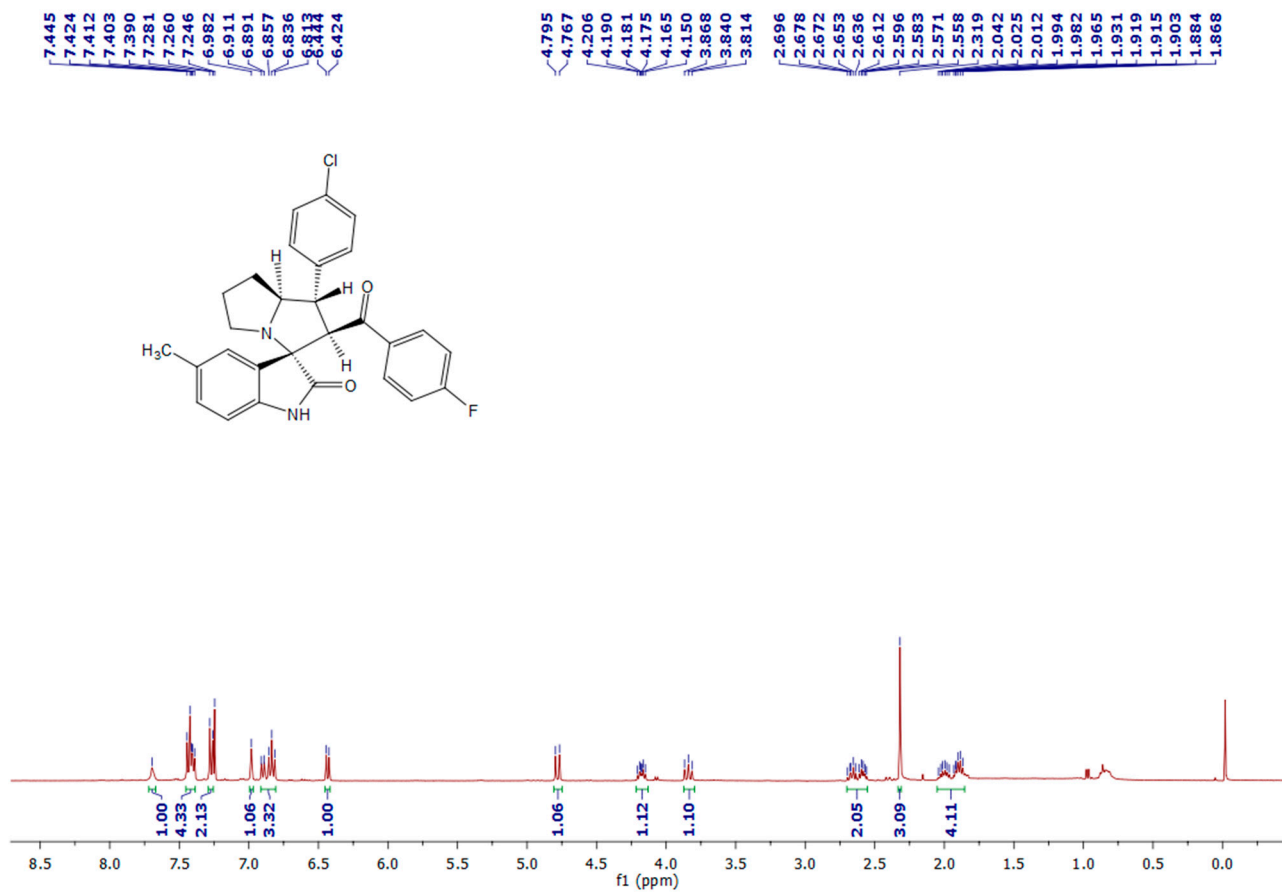

**Figure S1:** <sup>1</sup>H-NMR spectra of compound **23a**.

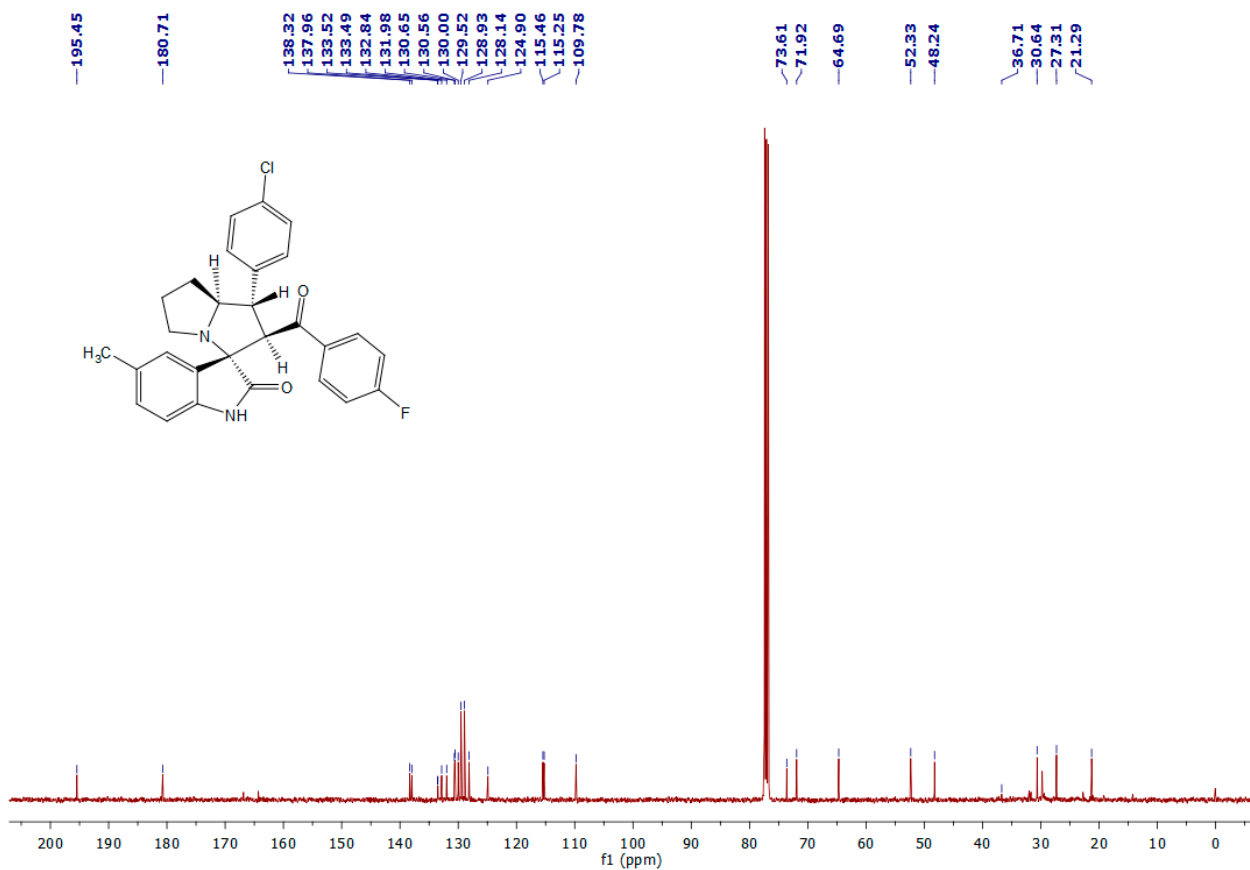

**Figure S2:** <sup>13</sup>C-NMR spectra of compound **23a**.

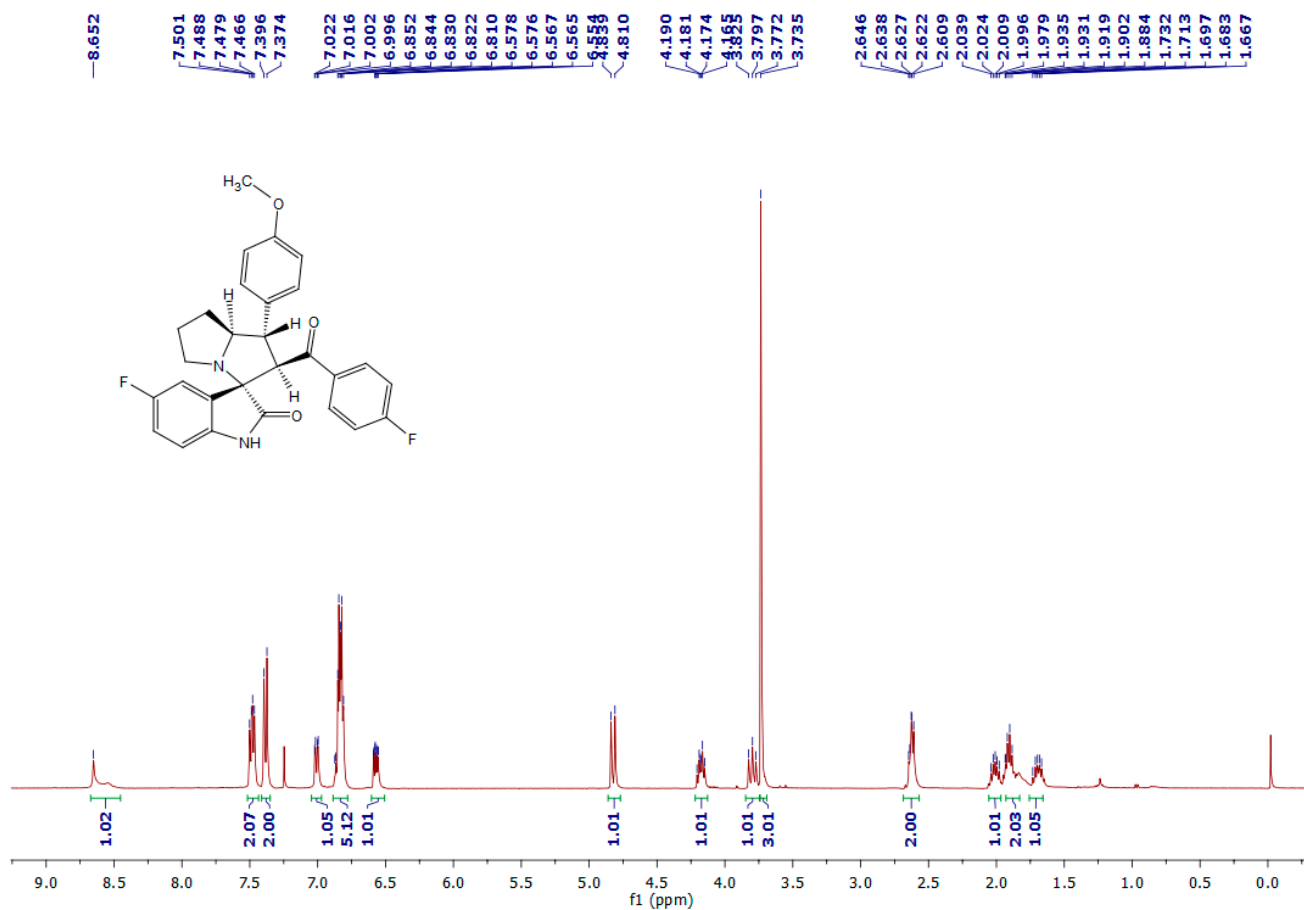

**Figure S3:** <sup>1</sup>H-NMR spectra of compound **23b**.

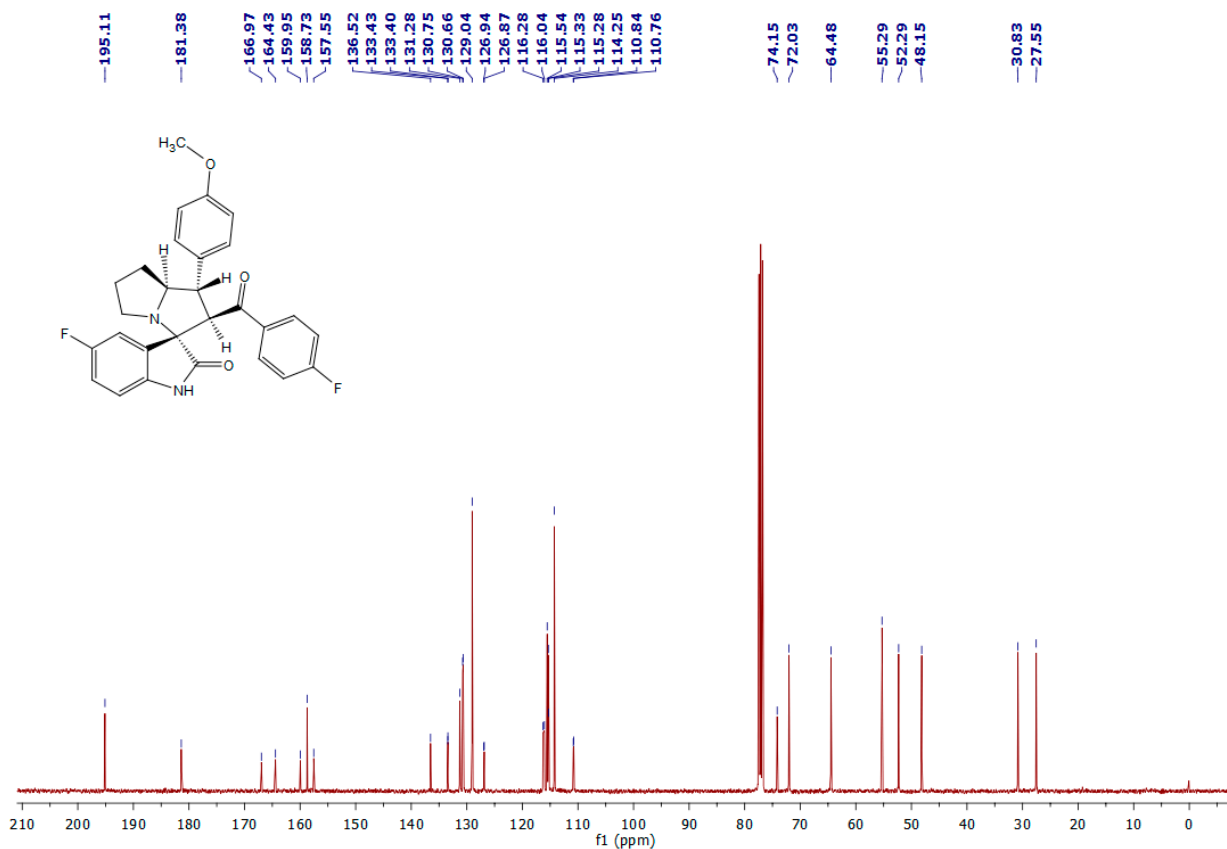

**Figure S4:** <sup>13</sup>C-NMR spectra of compound **23b**.

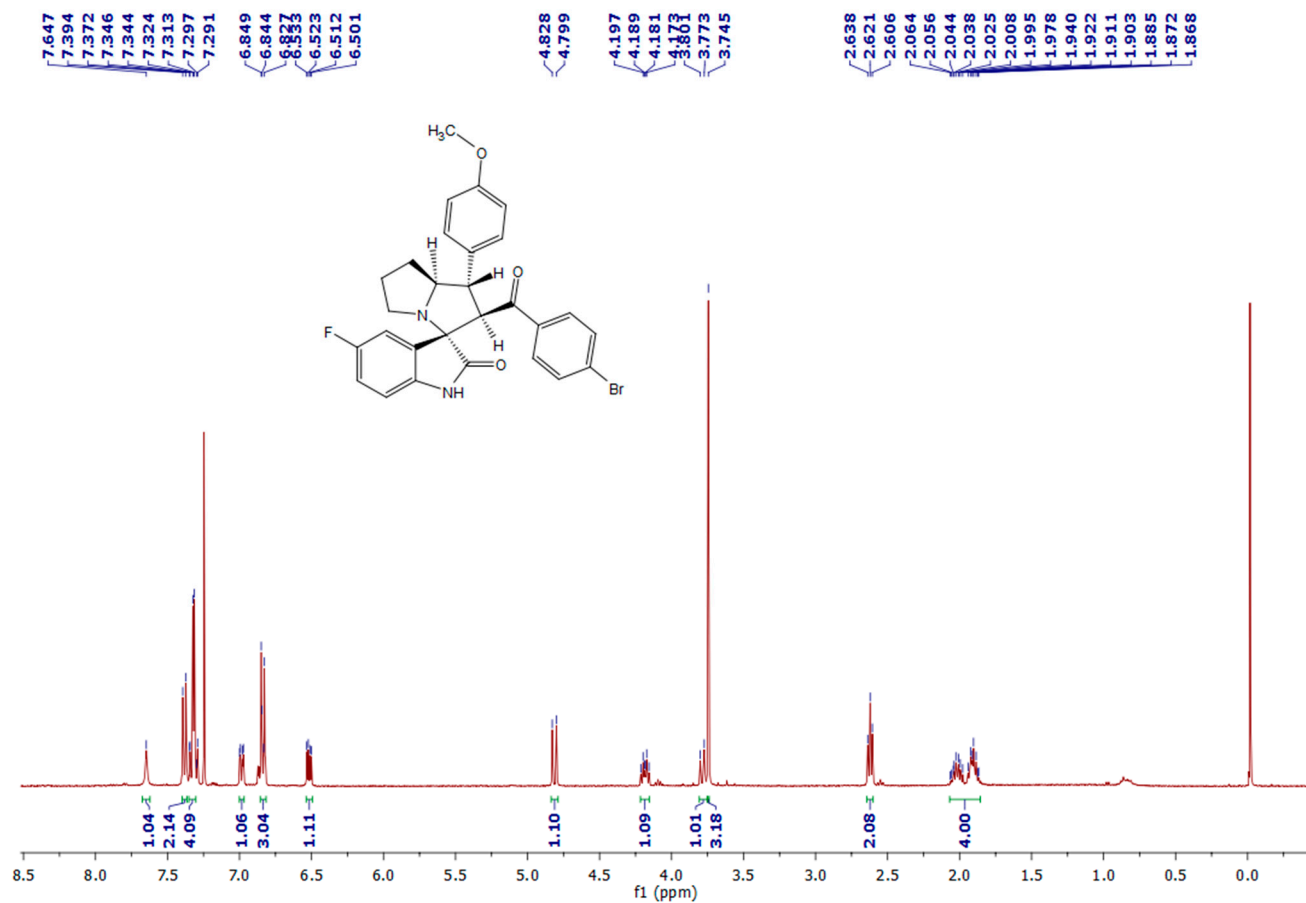

Figure S5:  $^1\text{H}$ -NMR spectra of compound 23c.

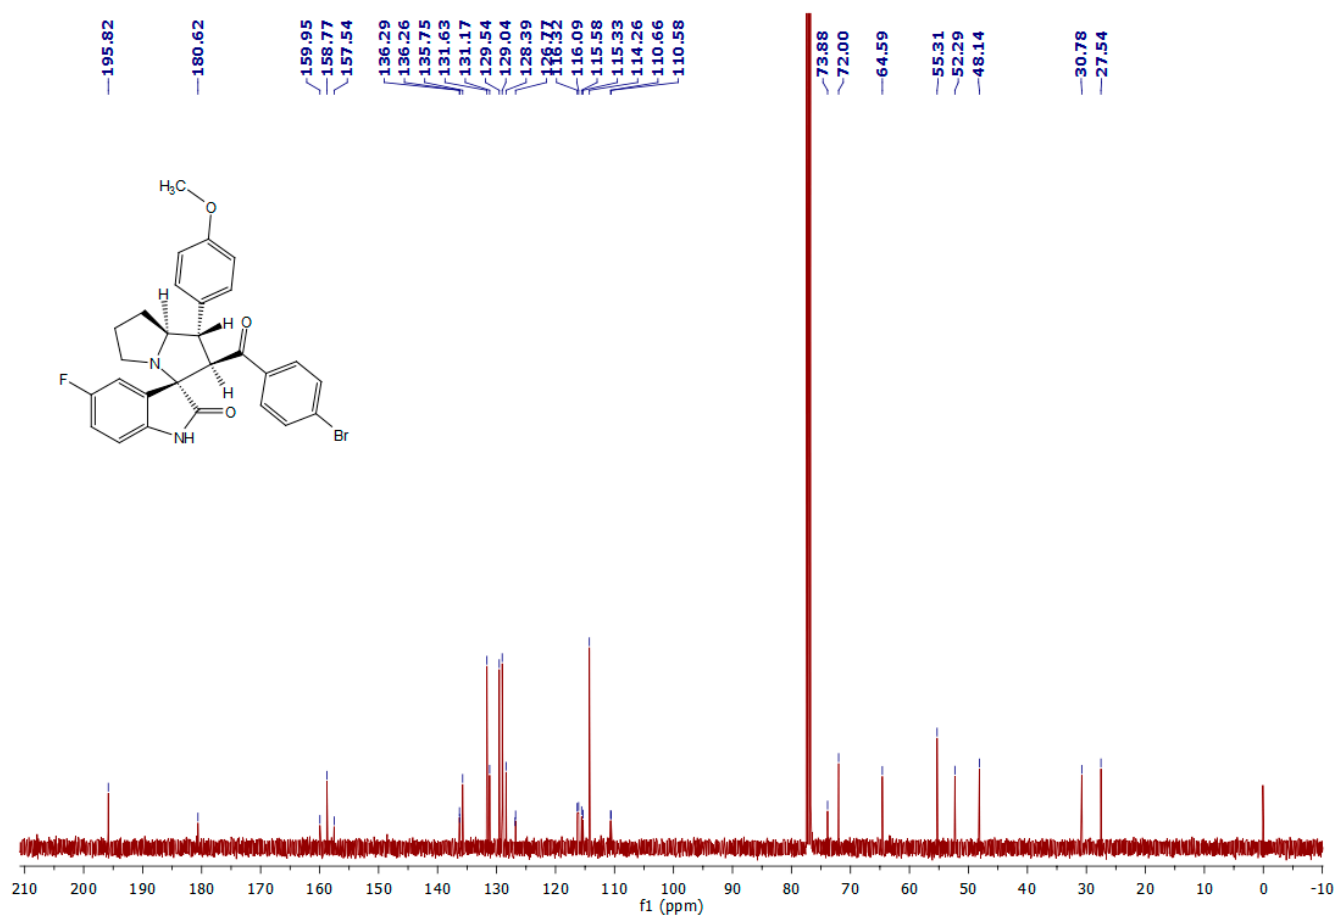

Figure S6:  $^{13}\text{C}$ -NMR spectra of compound 23c.

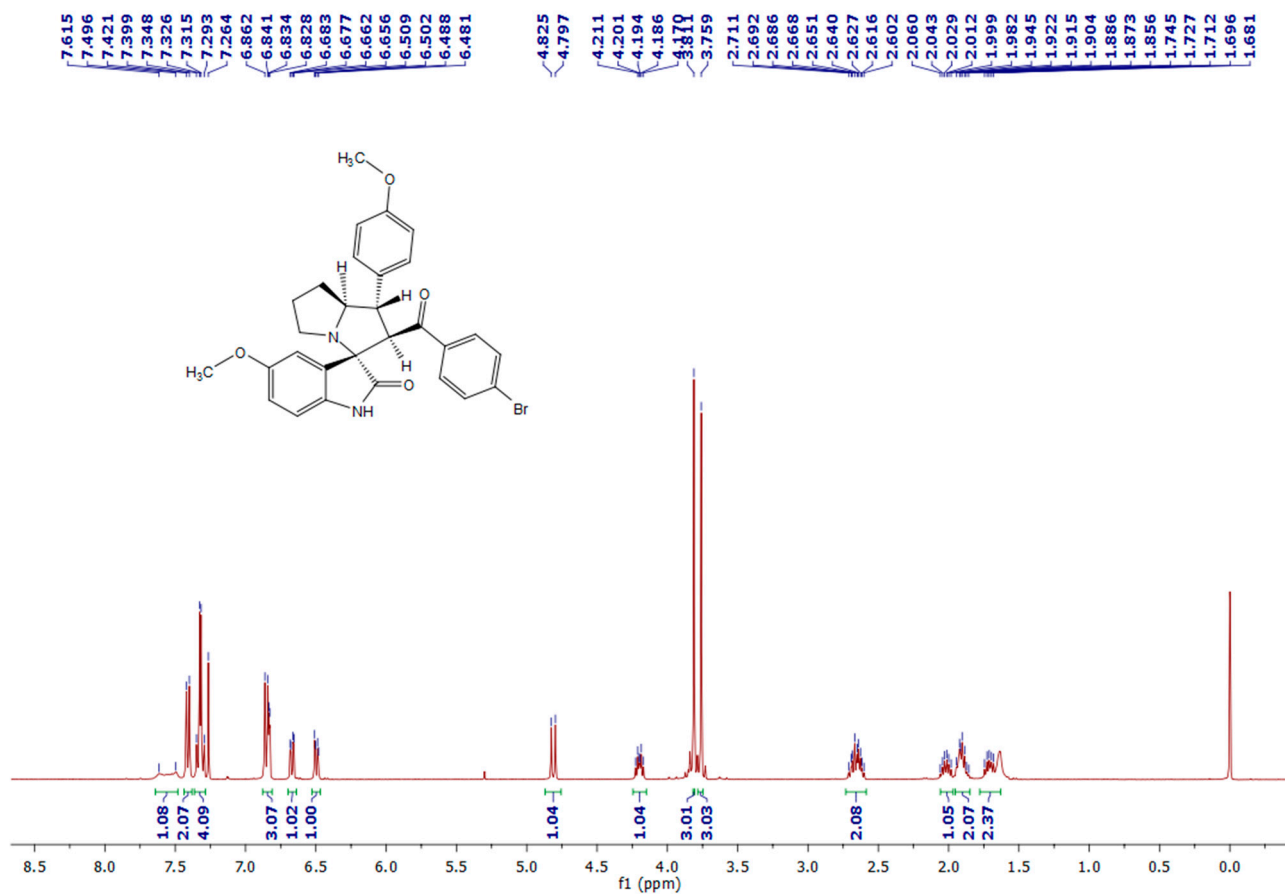

Figure S7:  $^1\text{H}$ -NMR spectra of compound 23d.

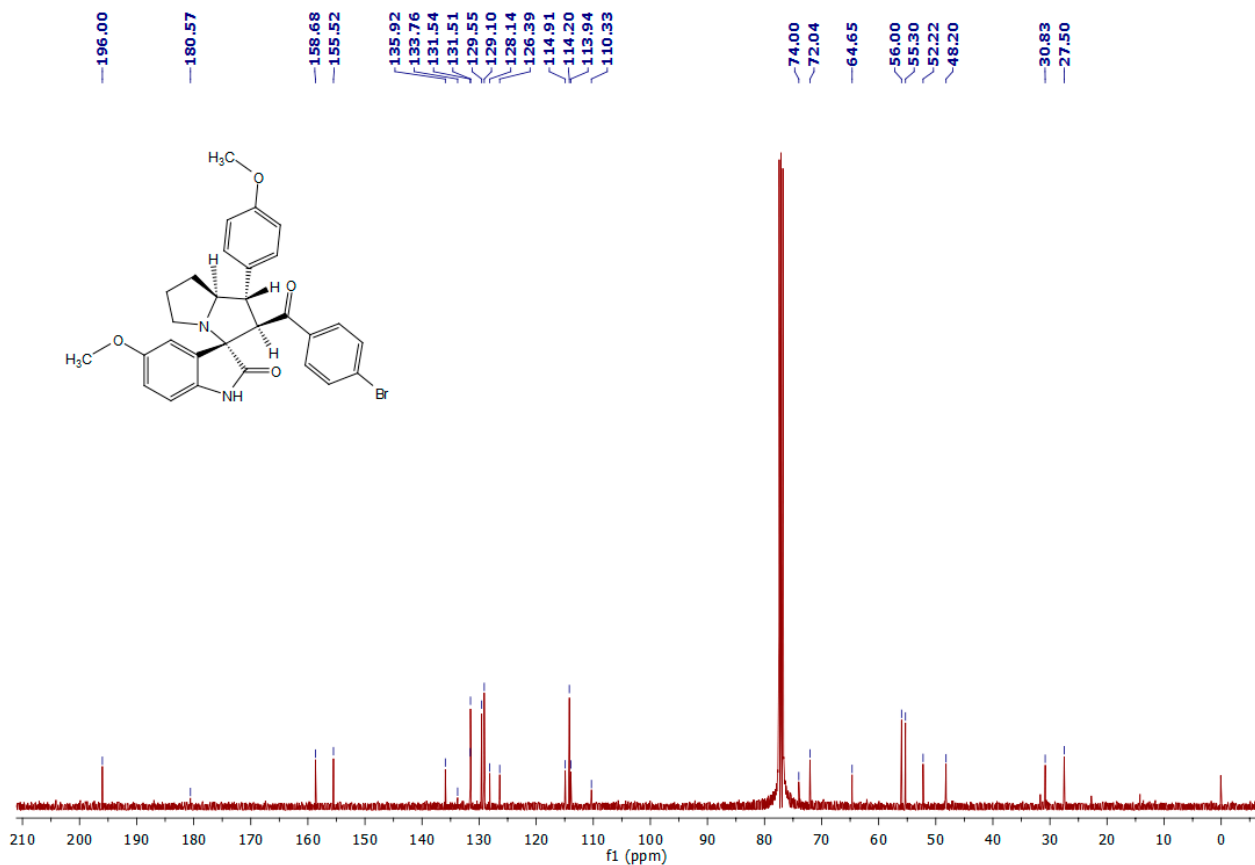

Figure S8:  $^{13}\text{C}$ -NMR spectra of compound 23d.

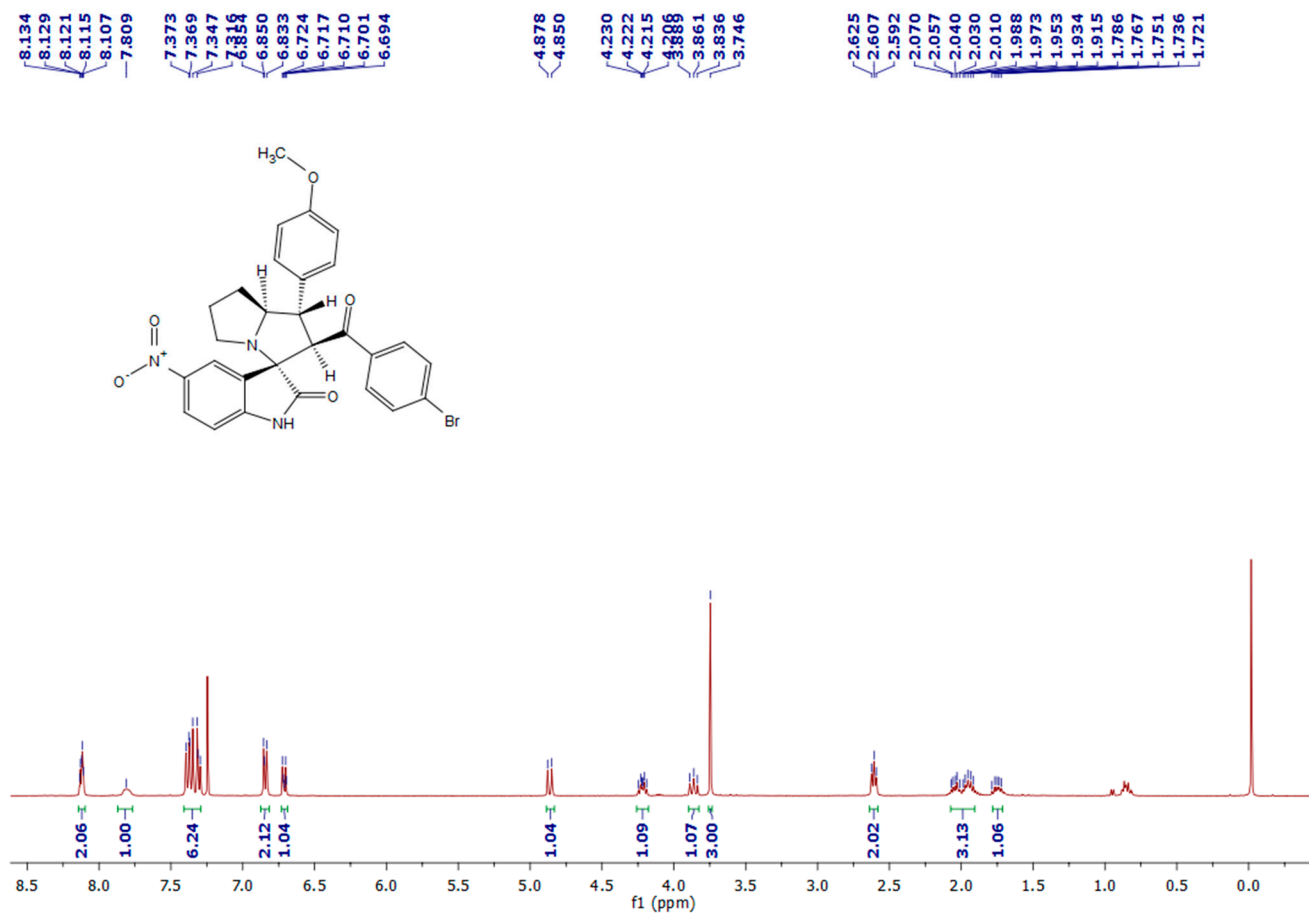

Figure S9:  $^1\text{H}$ -NMR spectra of compound 23e.

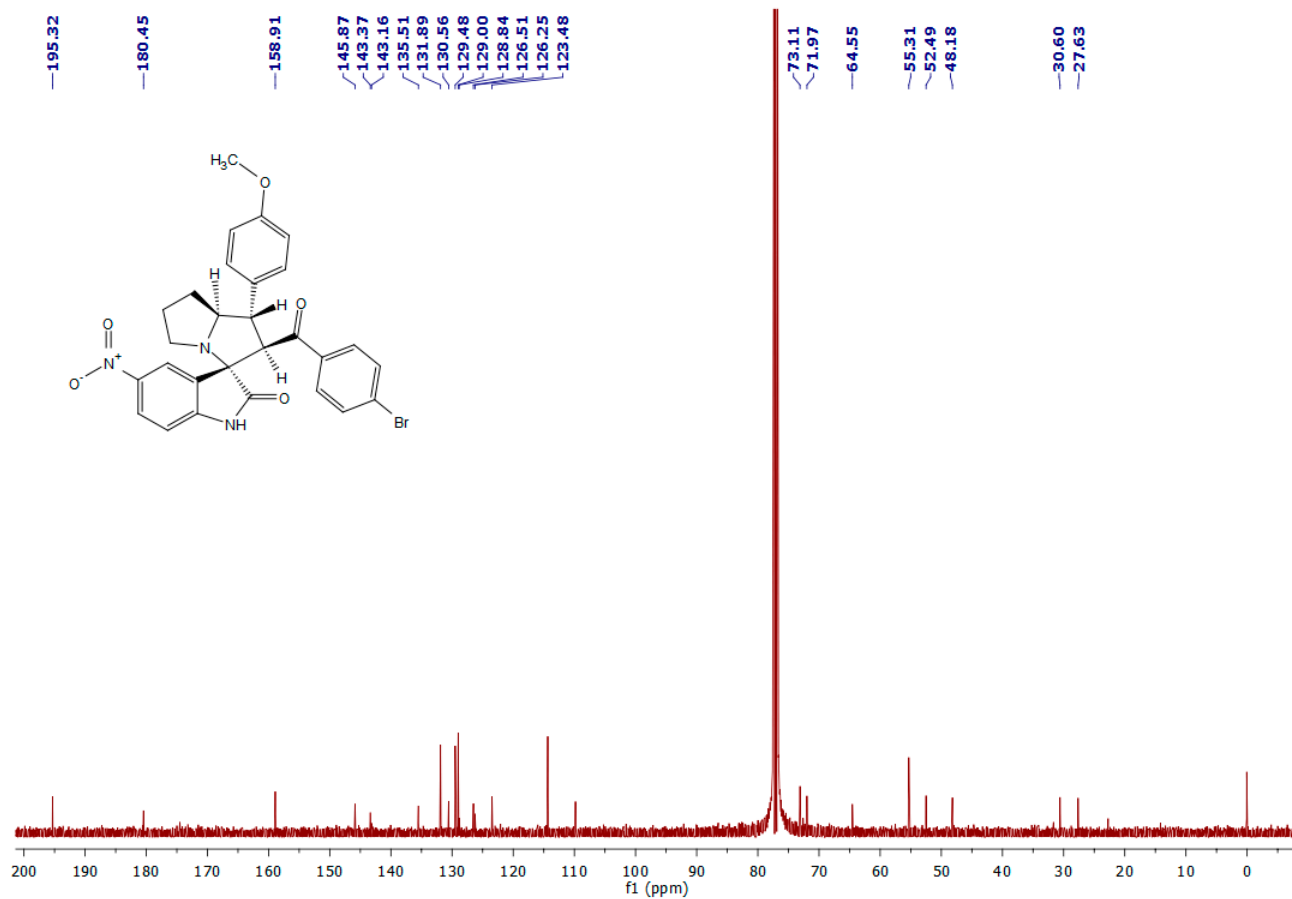

Figure S10:  $^{13}\text{C}$ -NMR spectra of compound 23e.

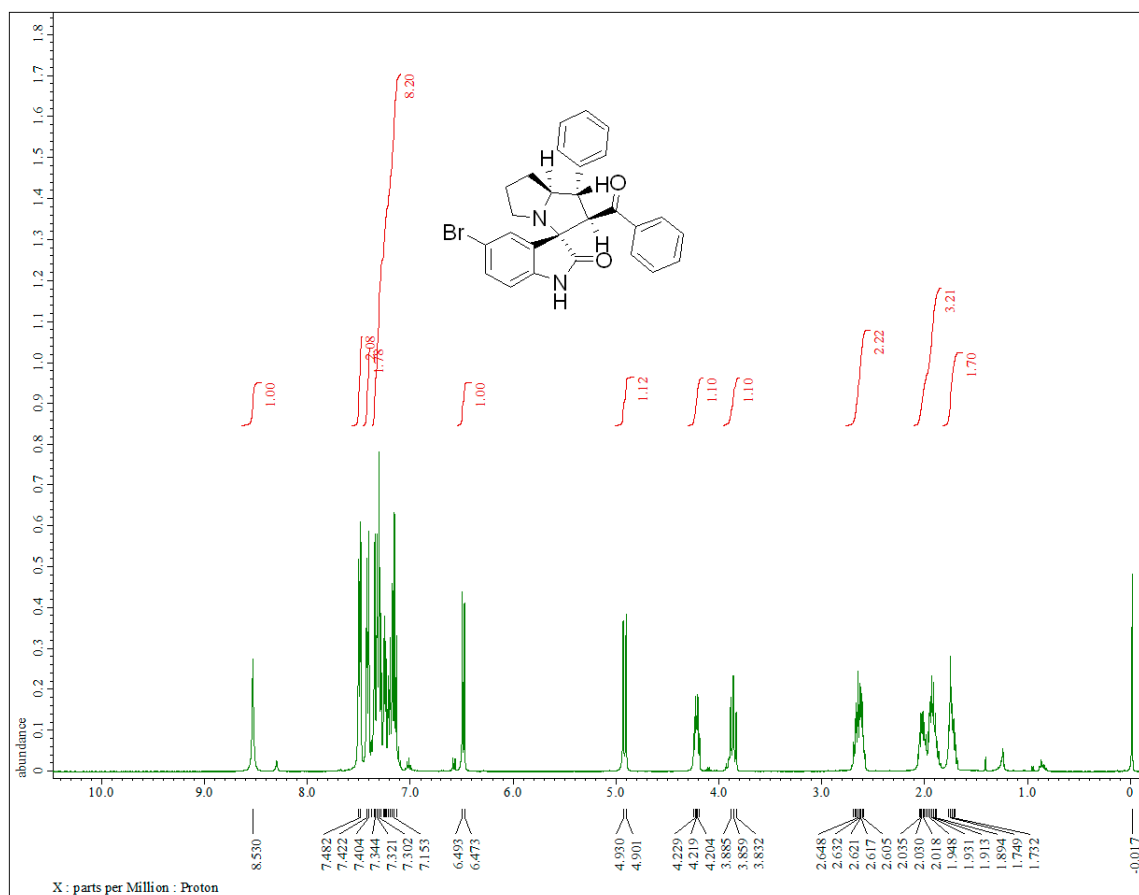

**Figure S11.** <sup>1</sup>H-NMR spectrum of the **23f**.

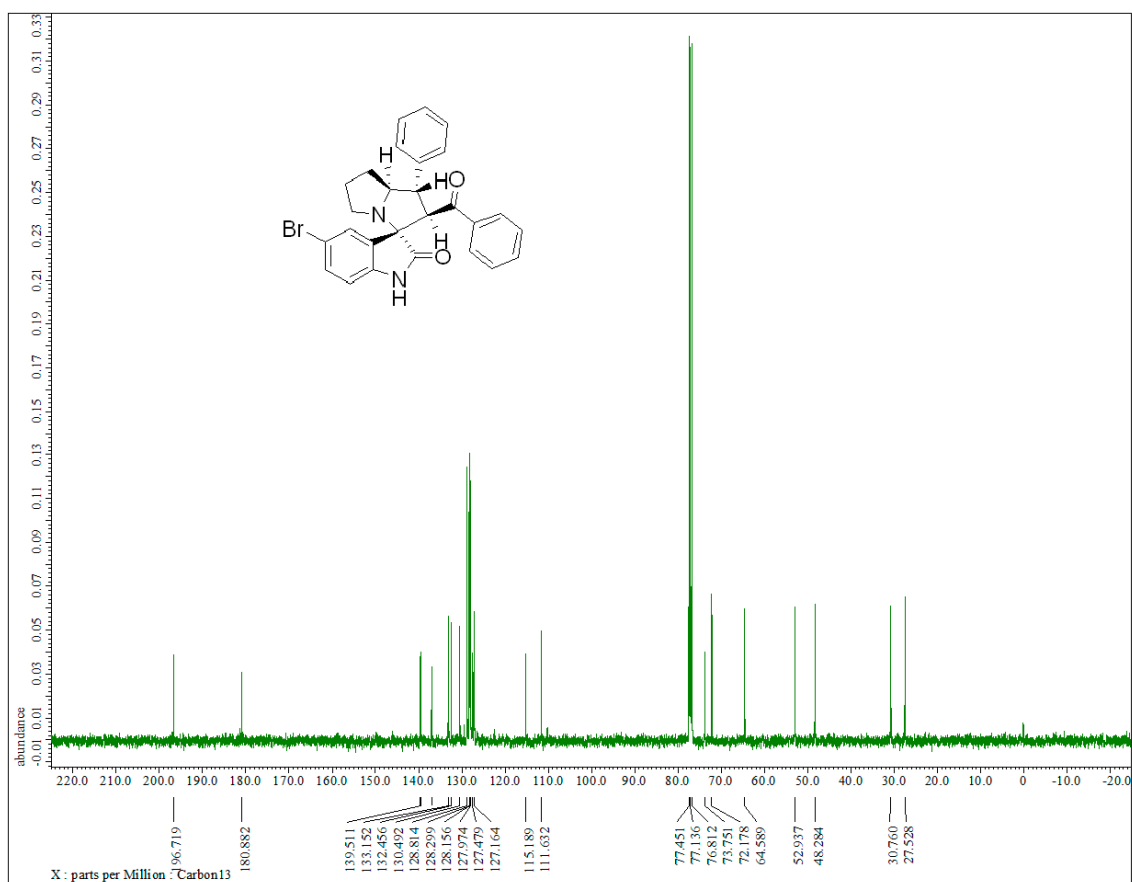

**Figure S12.** <sup>13</sup>C-NMR spectrum of the **23f**.

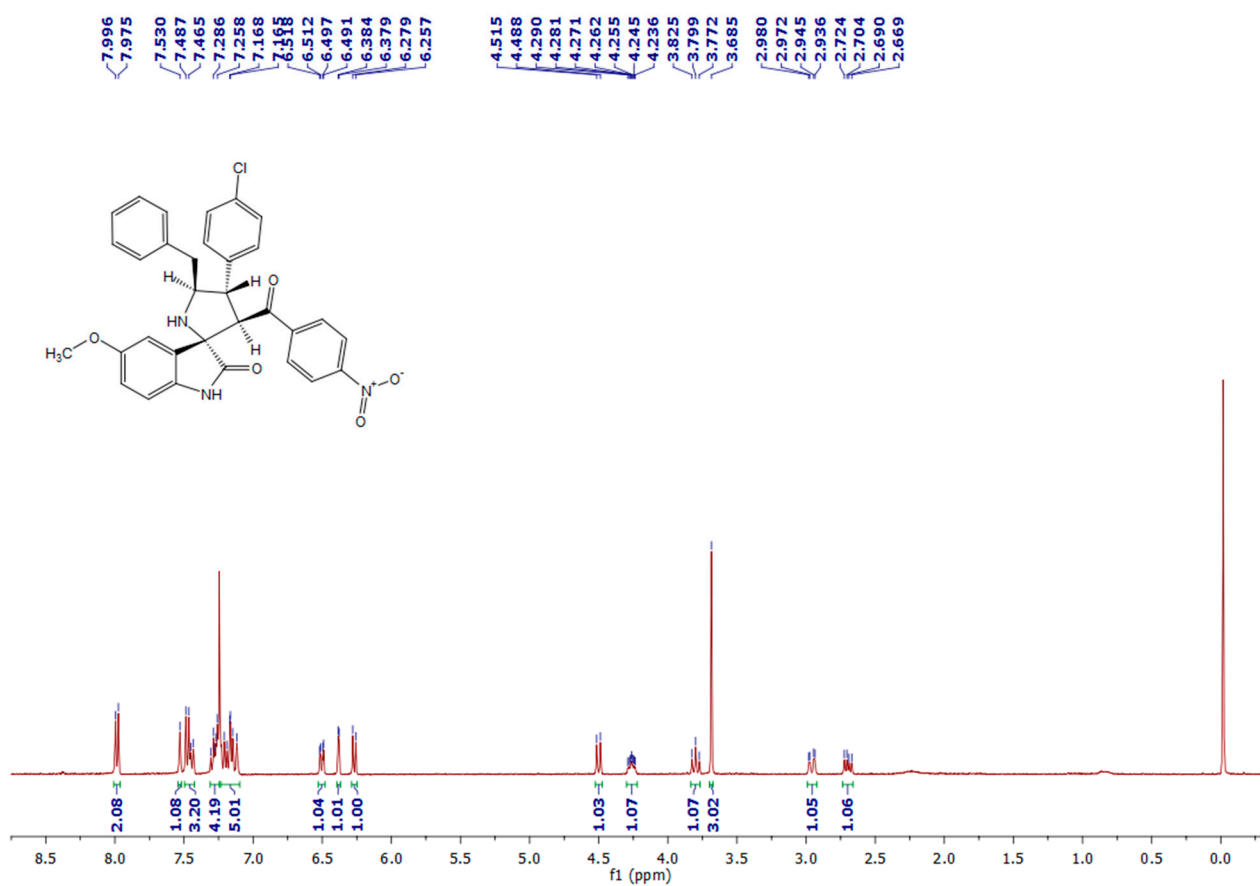

Figure S13: <sup>1</sup>H-NMR spectra of compound 24a.

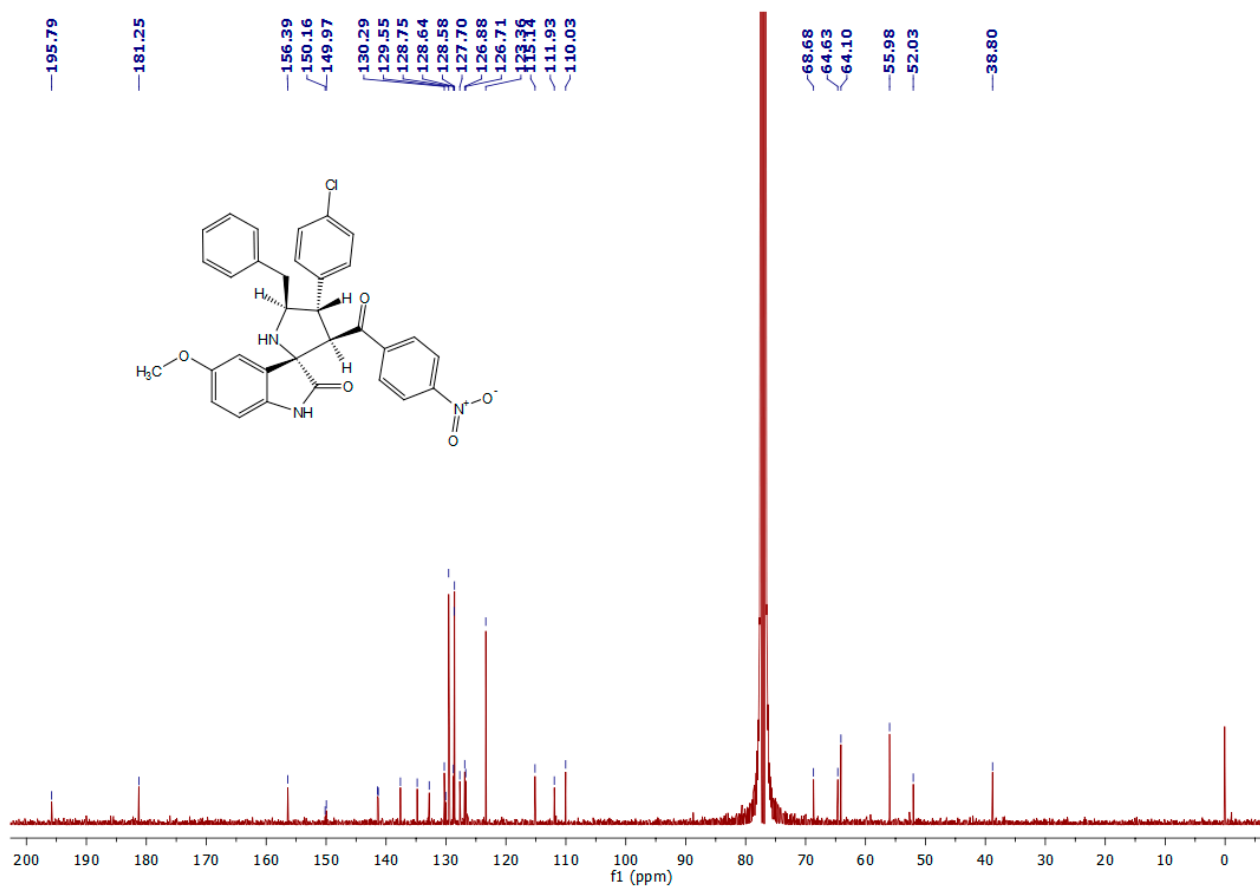

Figure S14: <sup>13</sup>C-NMR spectra of compound 24a.

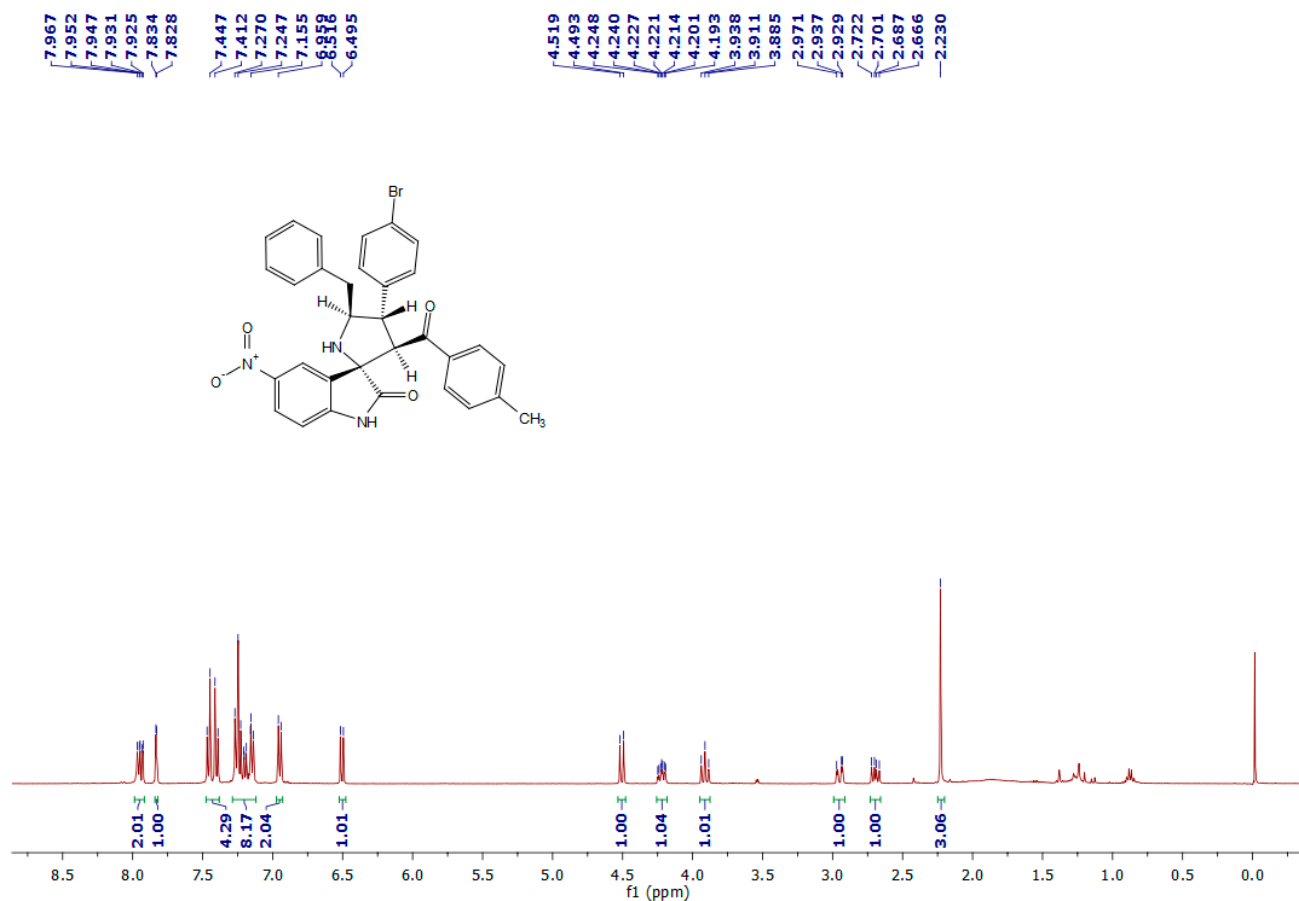

Figure S15:  $^1\text{H}$ -NMR spectra of compound 24b.

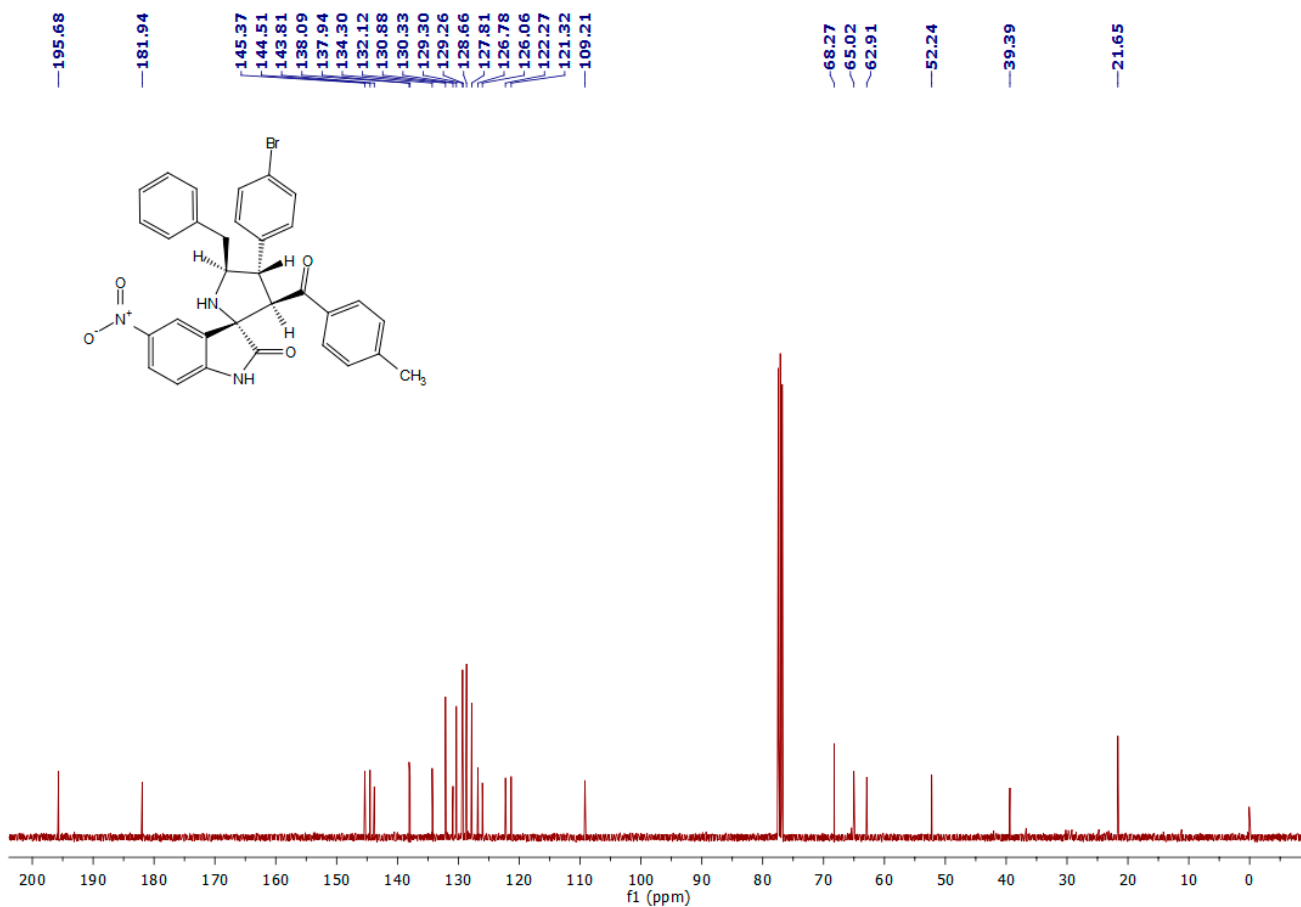

Figure S16:  $^{13}\text{C}$ -NMR spectra of compound 24b.

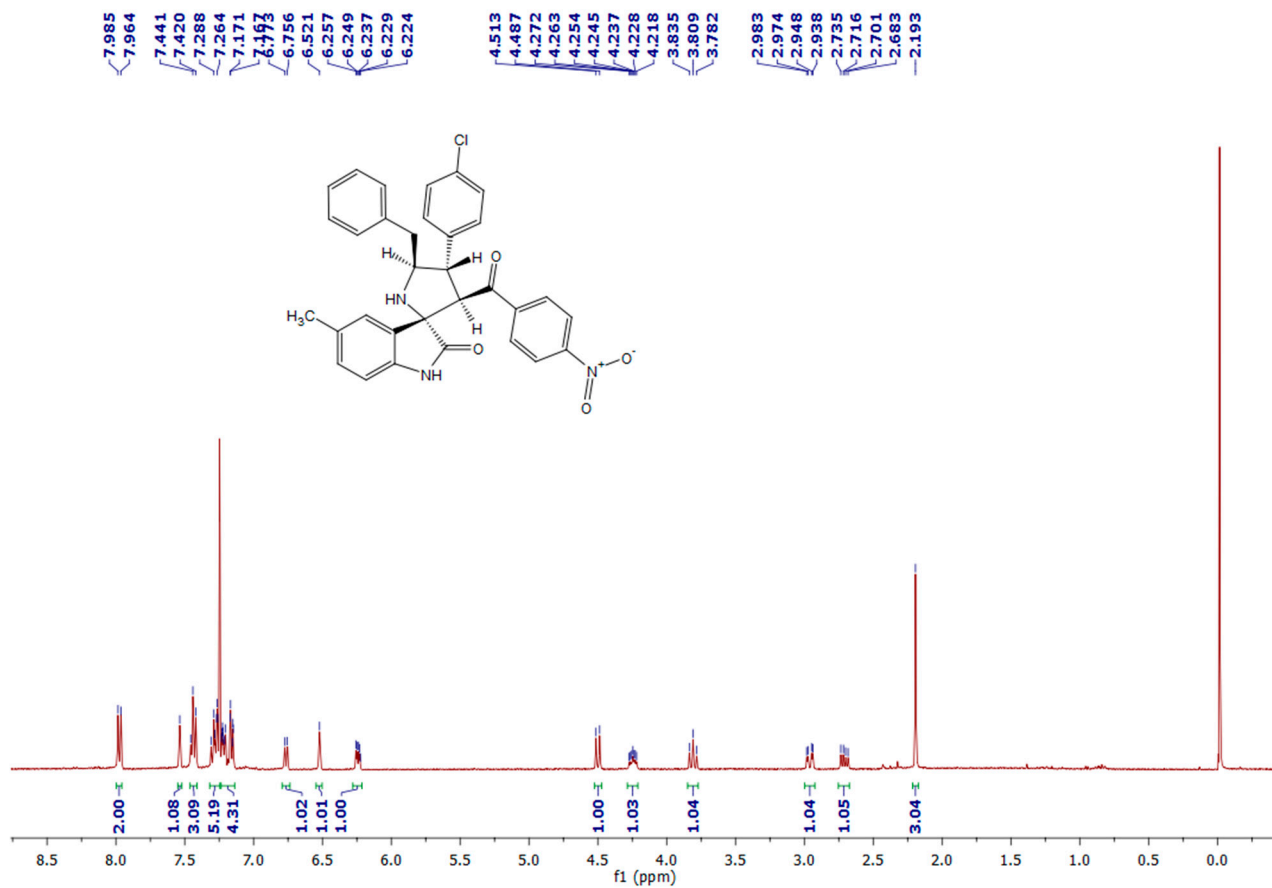

Figure S17:  $^1\text{H}$ -NMR spectra of compound 24c.

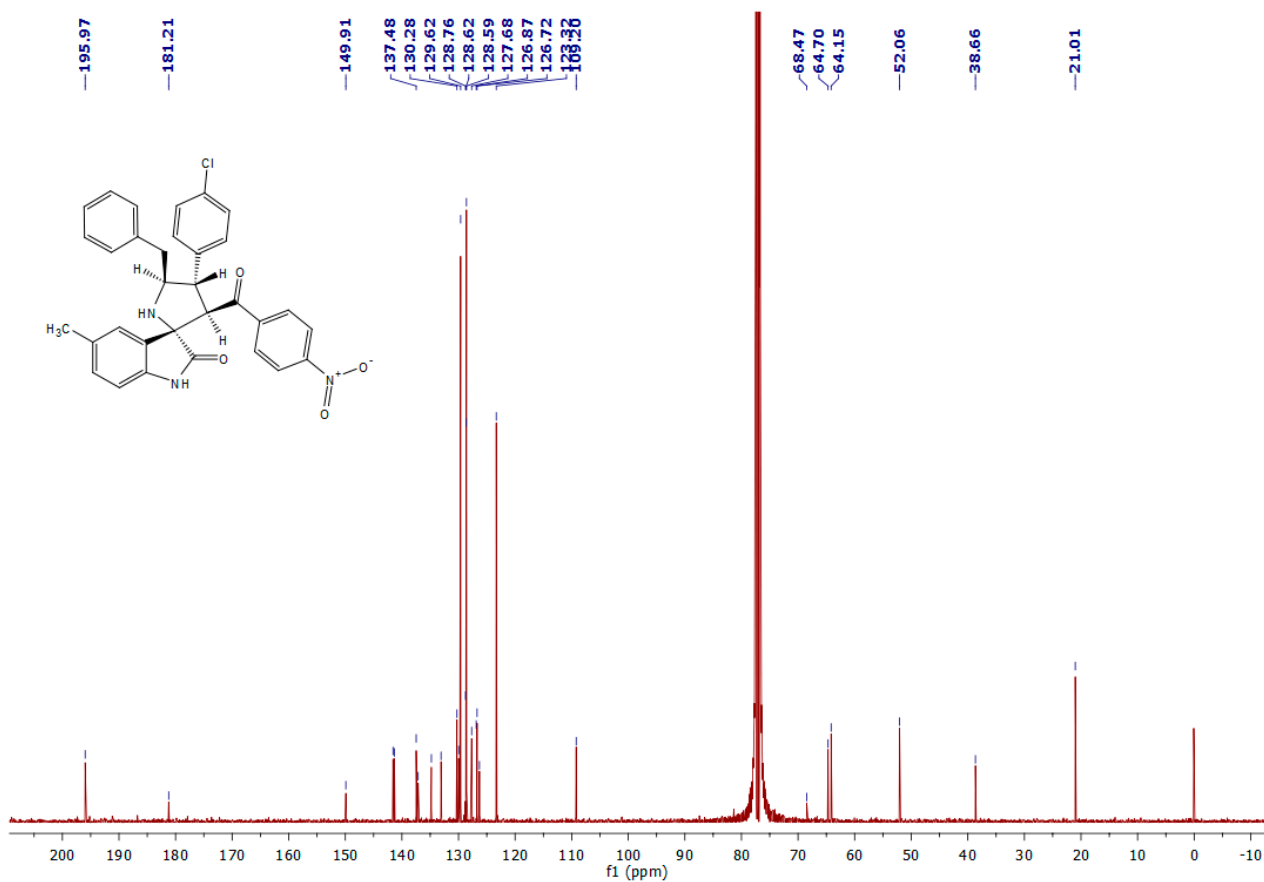

Figure S18:  $^{13}\text{C}$ -NMR spectra of compound 24c.

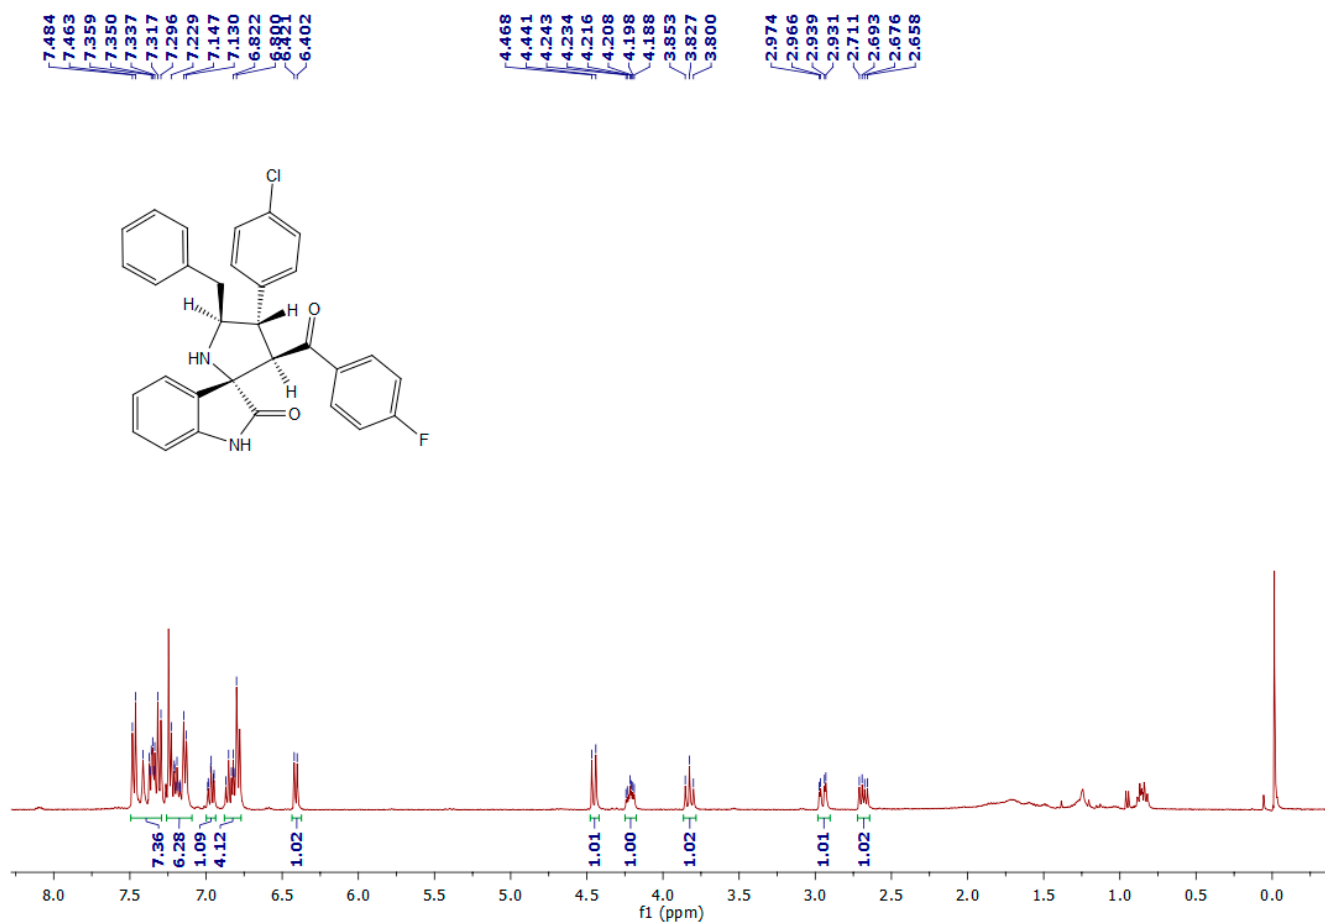

Figure S19: <sup>1</sup>H-NMR spectra of compound 24d.

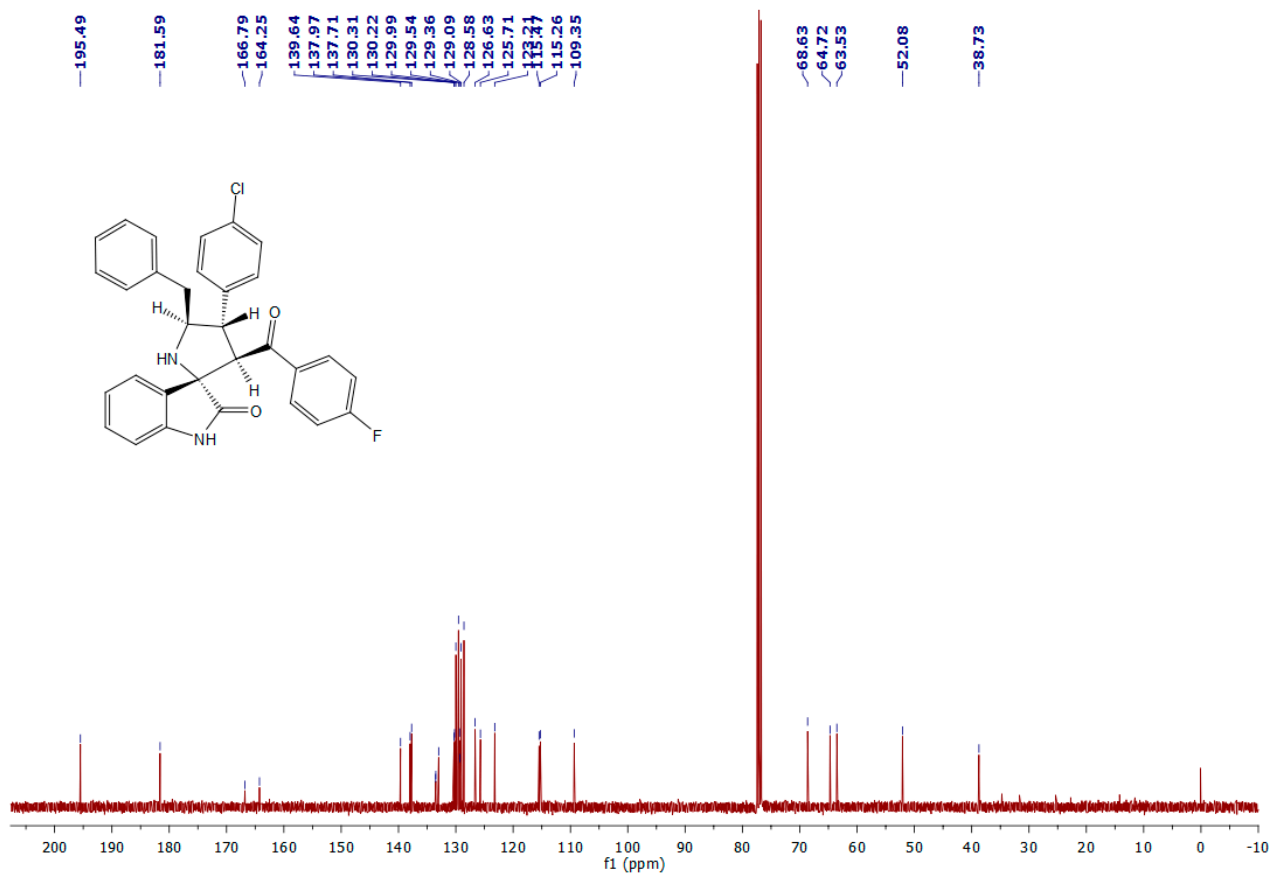

Figure S20: <sup>13</sup>C-NMR spectra of compound 24d.

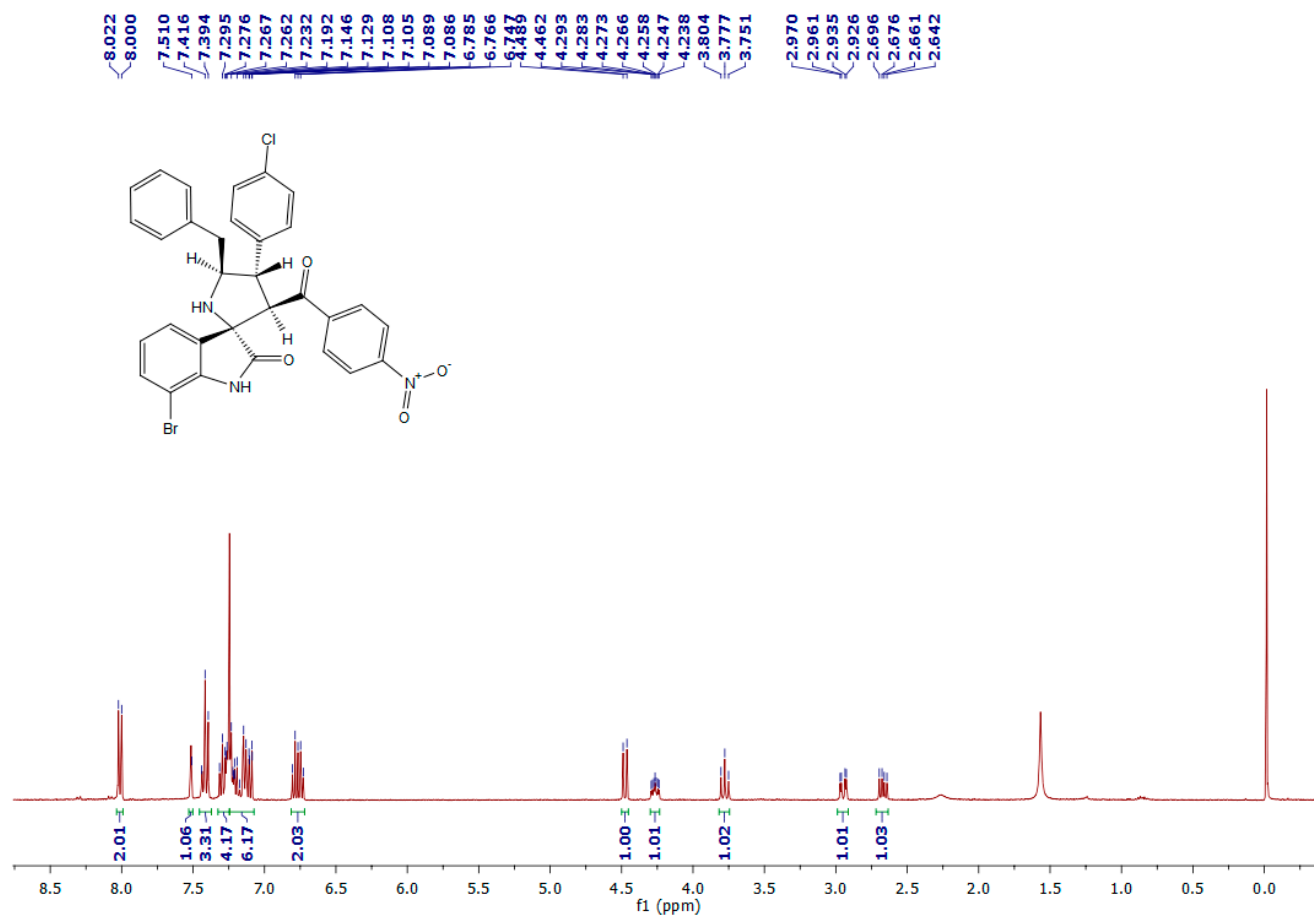

Figure S21: <sup>1</sup>H-NMR spectra of compound 24e.

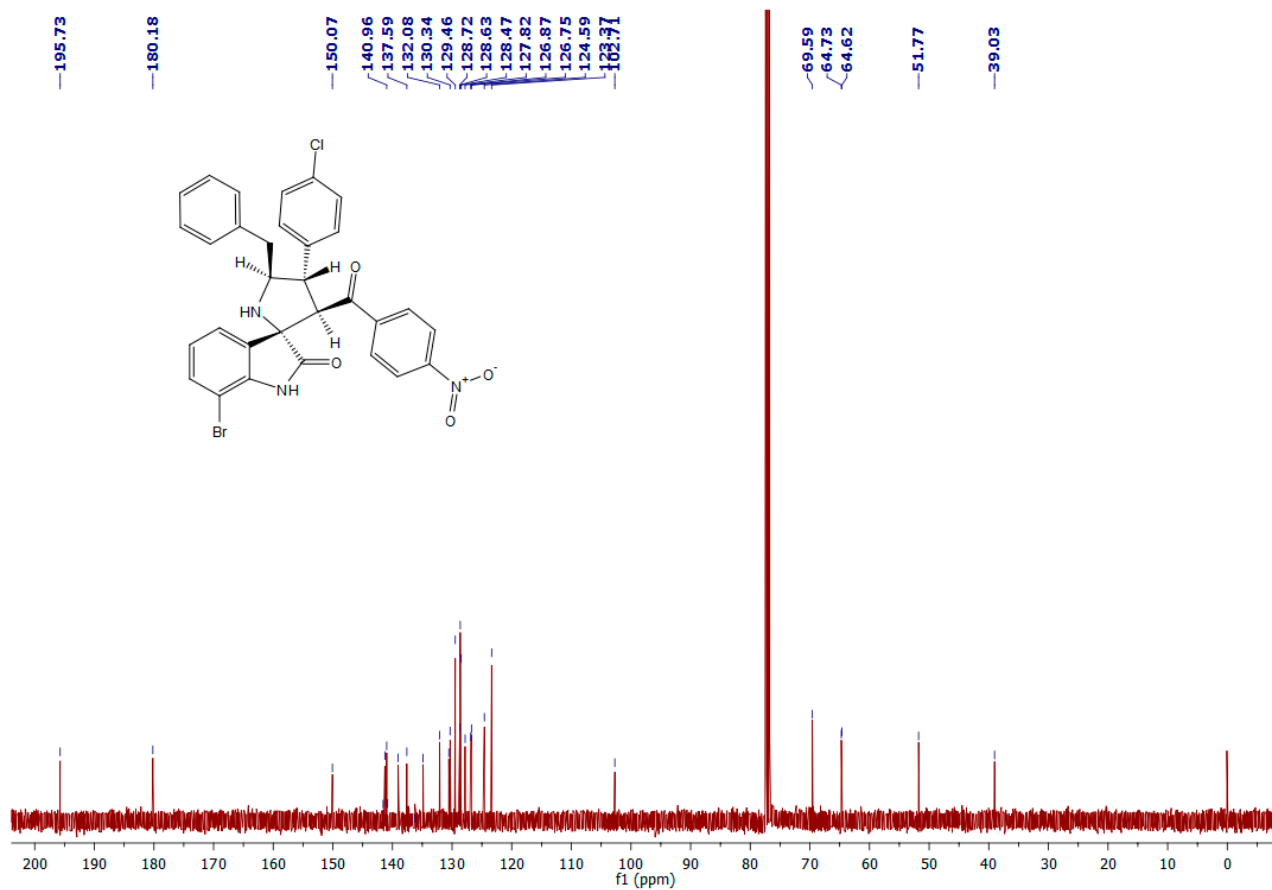

Figure S22: <sup>13</sup>C-NMR spectra of compound 24e.



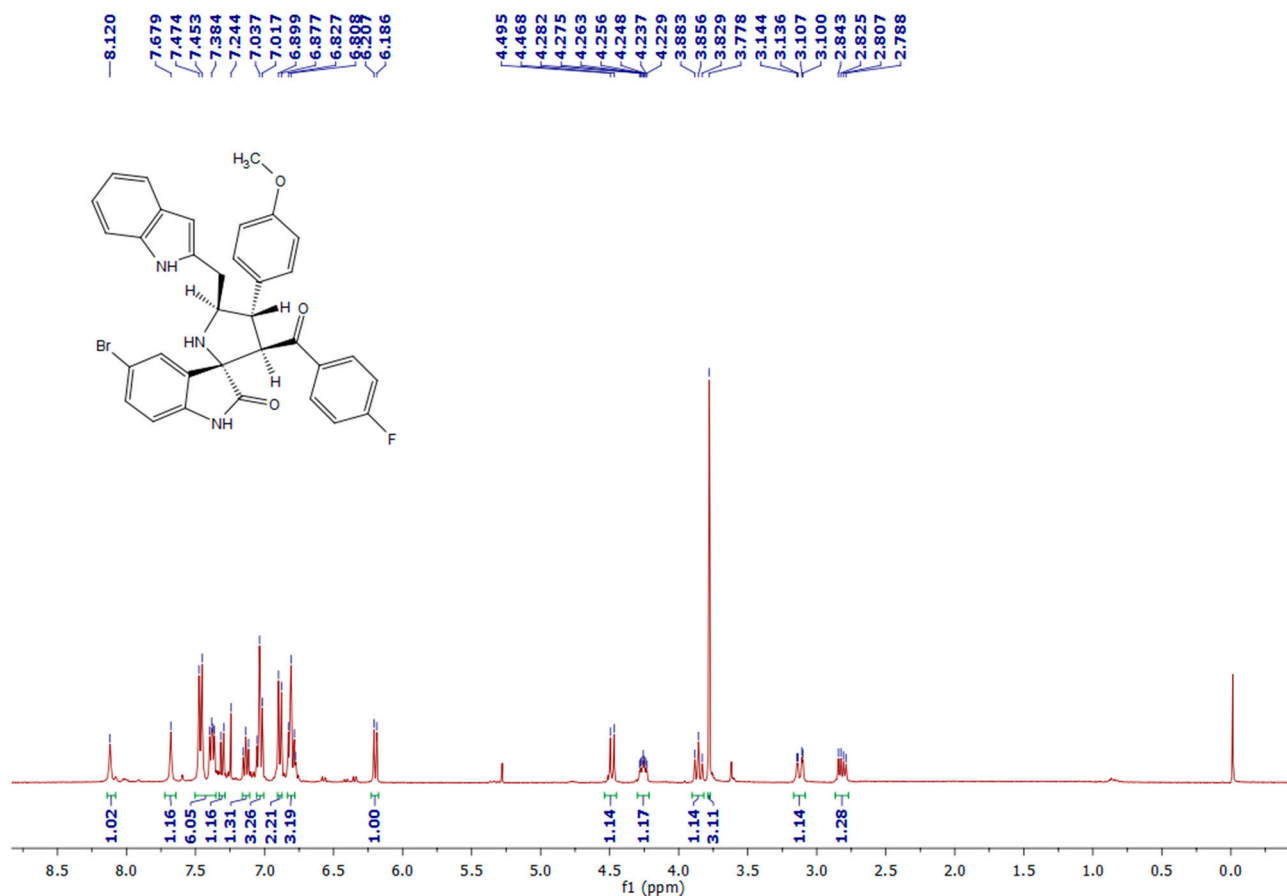

Figure S25: <sup>1</sup>H-NMR spectra of compound 25a.

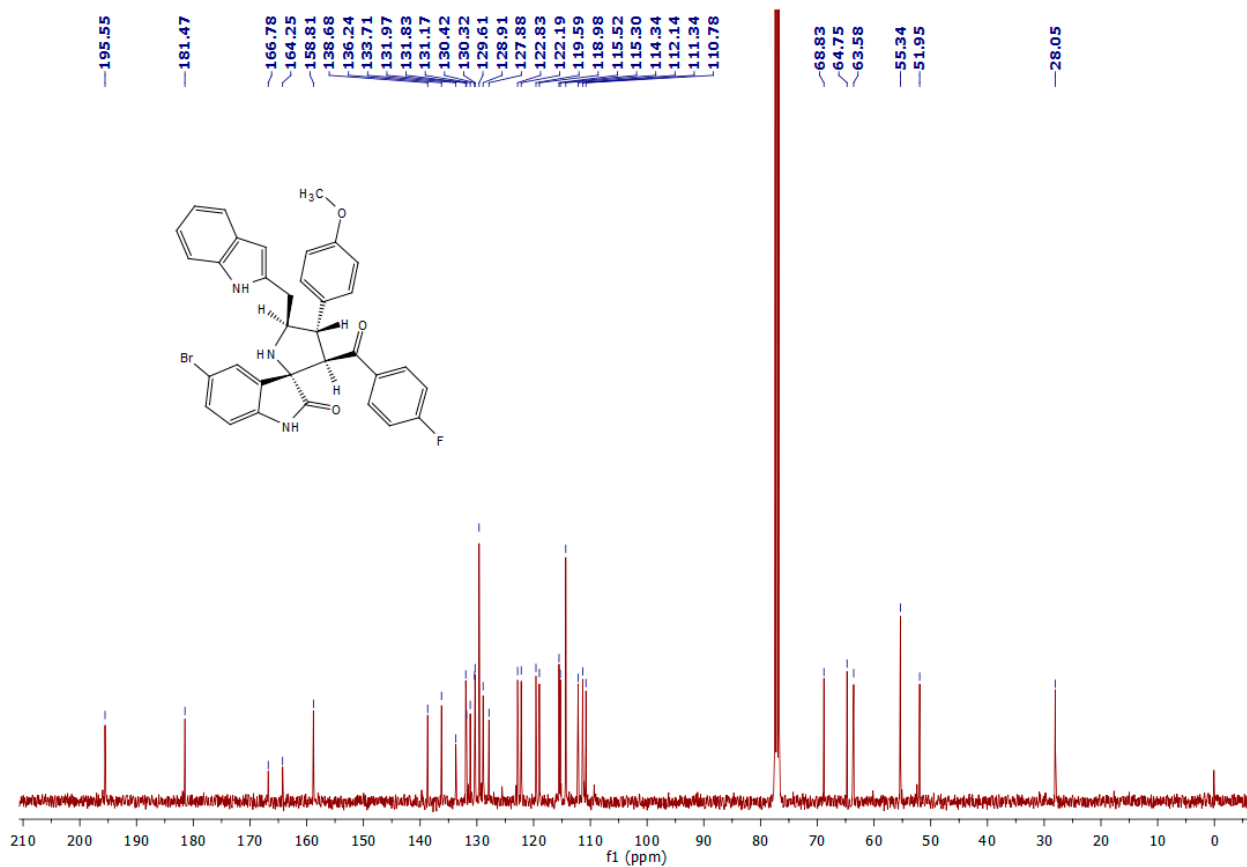

Figure S26: <sup>13</sup>C-NMR spectra of compound 25a.



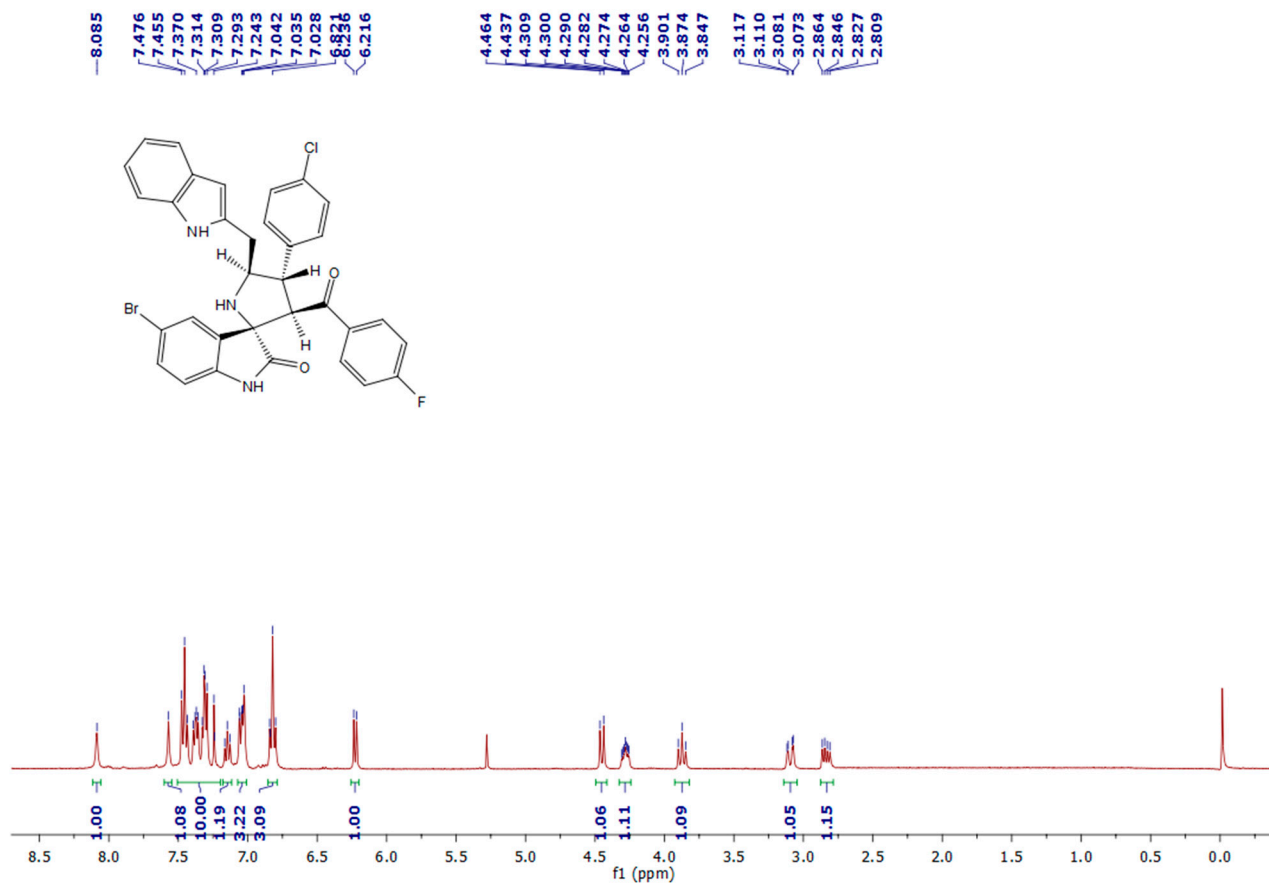

Figure S29:  $^1\text{H}$ -NMR spectra of compound 25c.

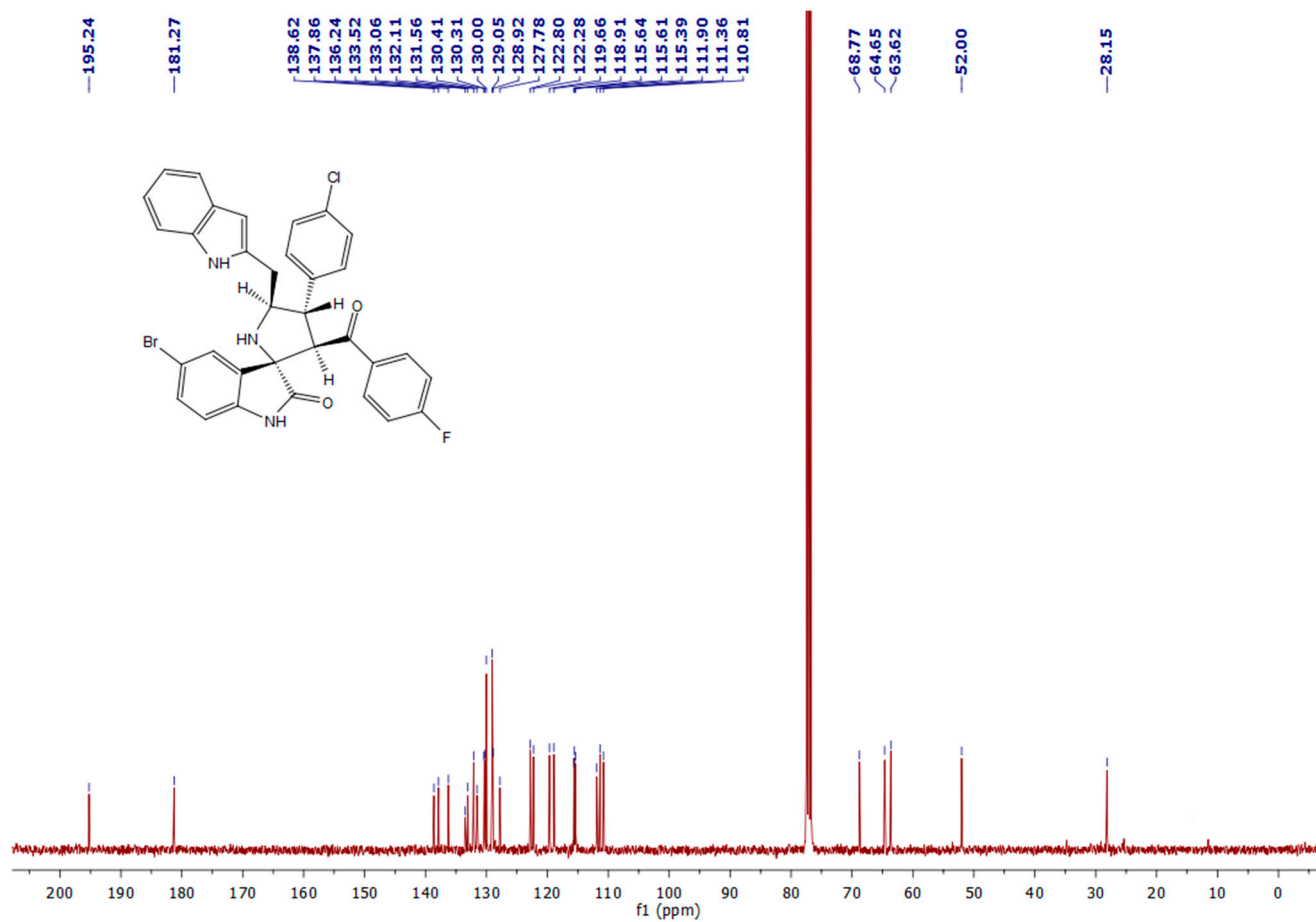

Figure S30:  $^{13}\text{C}$ -NMR spectra of compound 25c.

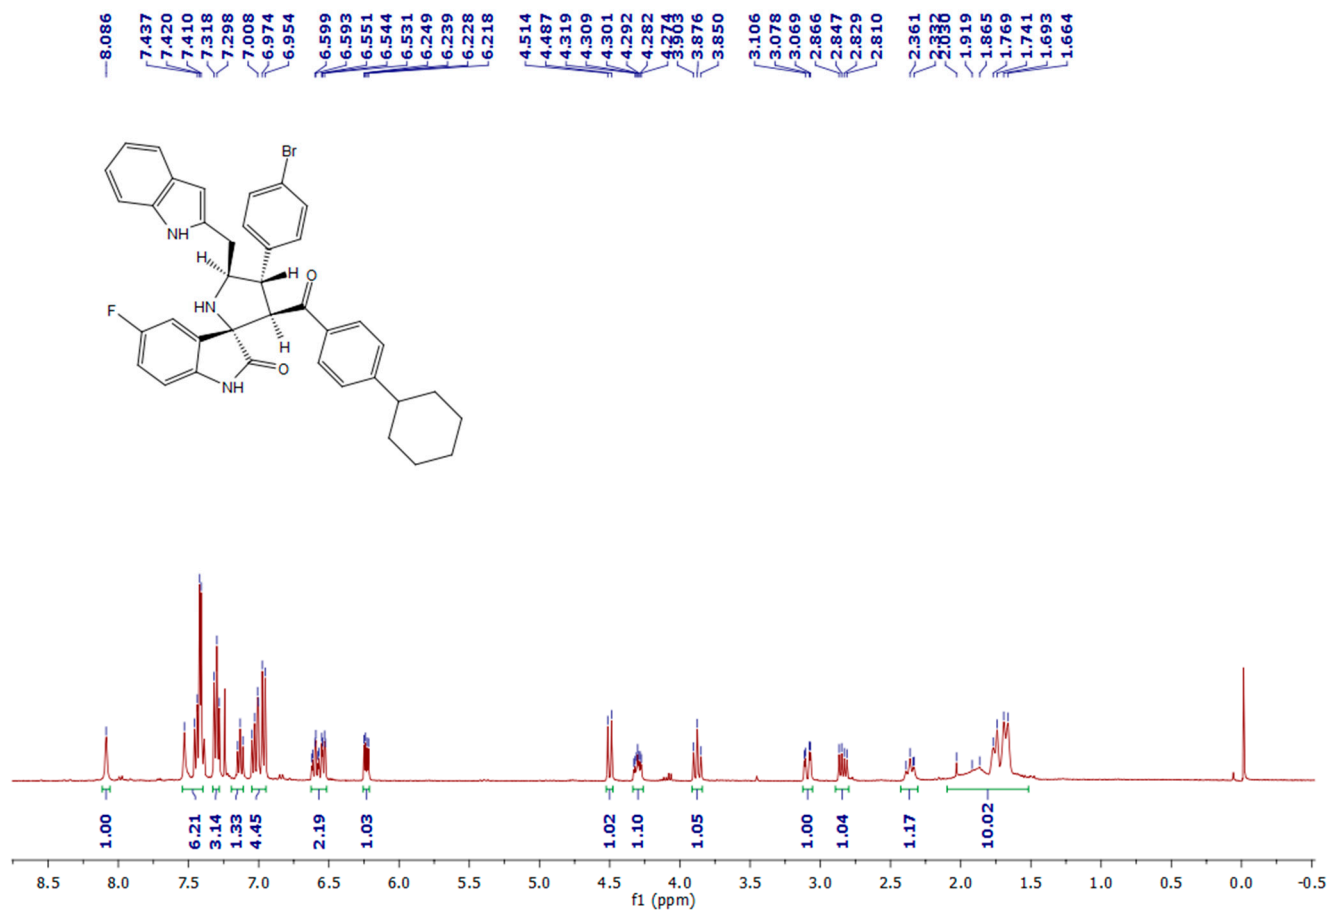

Figure S31: <sup>1</sup>H-NMR spectra of compound 25d.

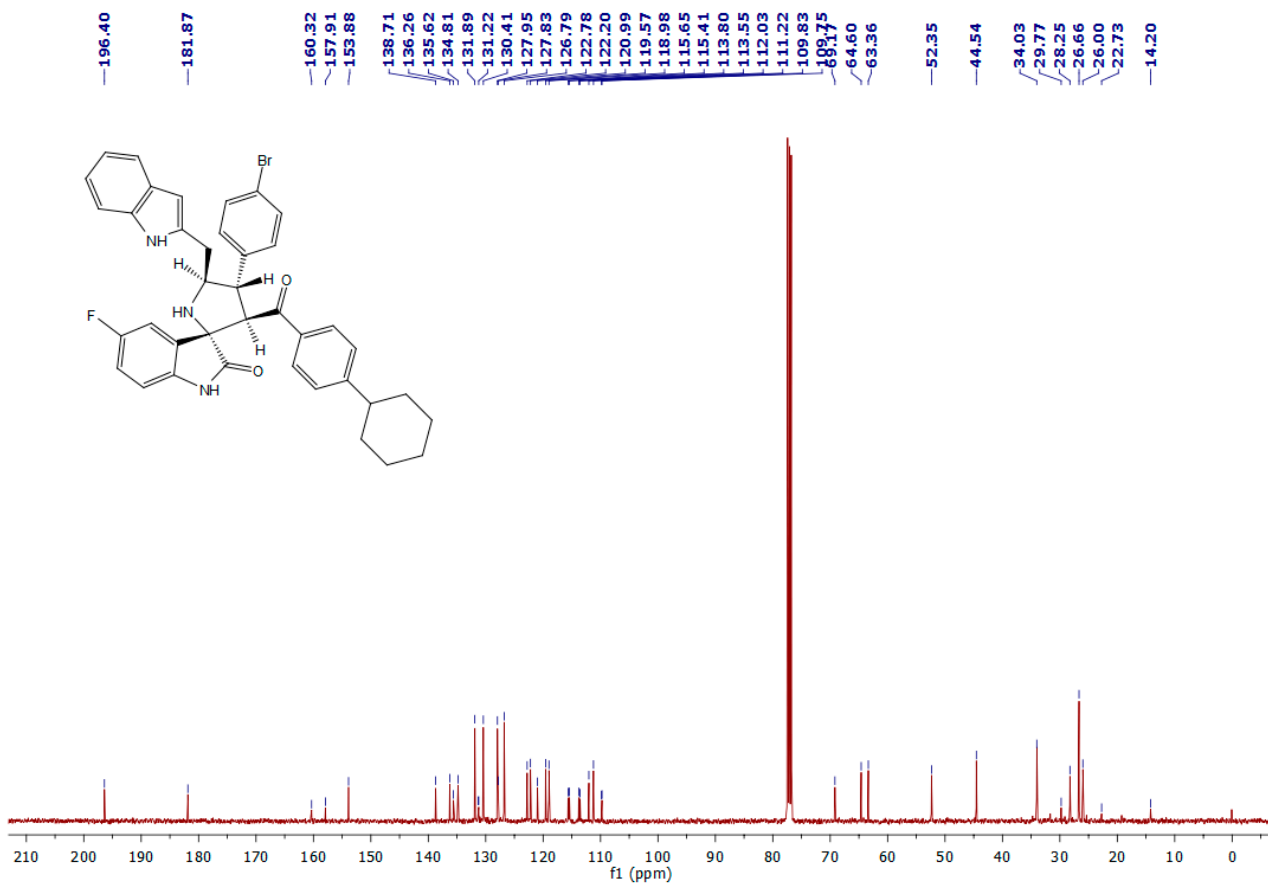

Figure S32: <sup>13</sup>C-NMR spectra of compound 25d.



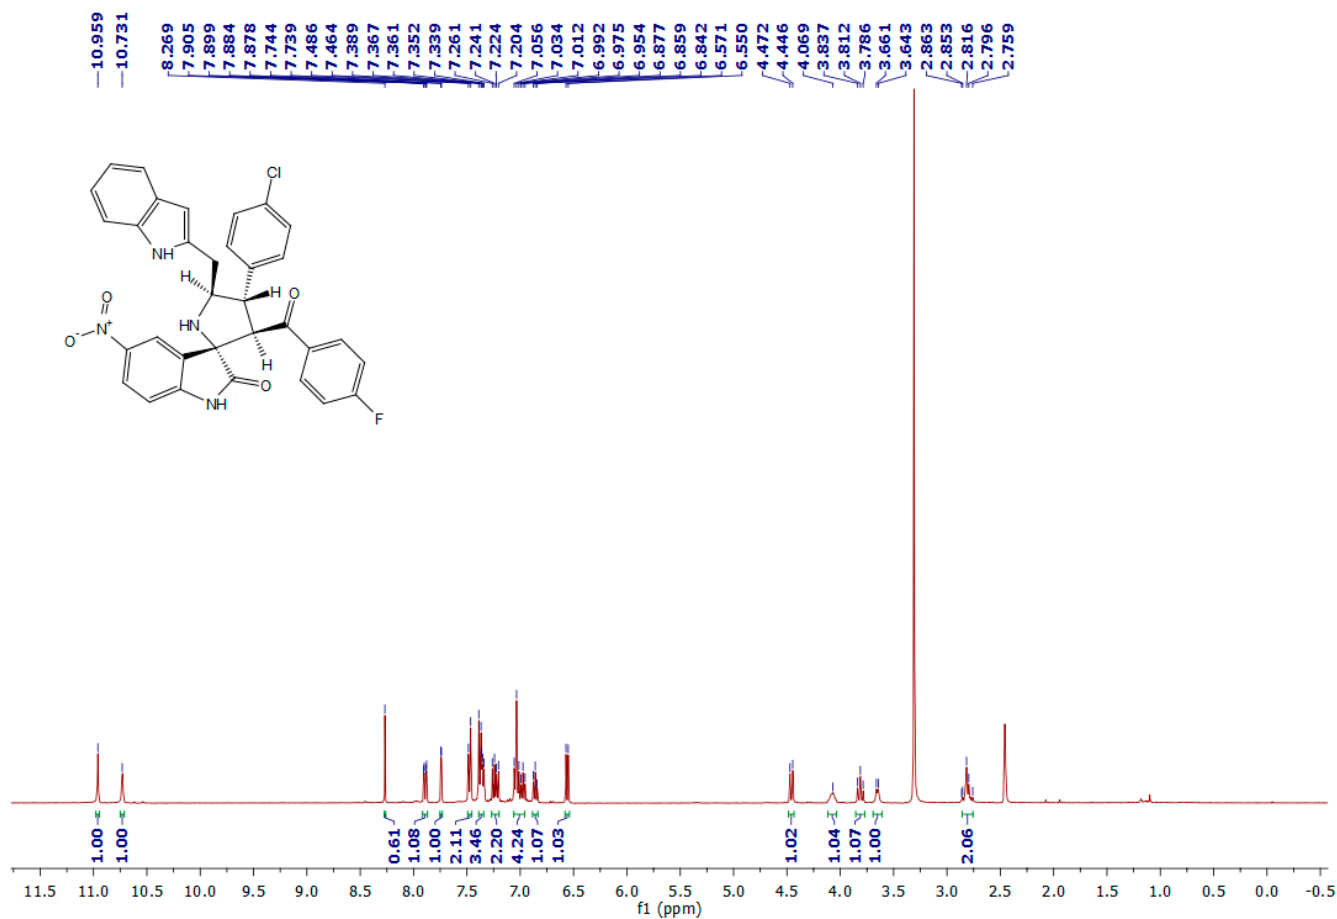

Figure S35:  $^1\text{H}$ -NMR spectra of compound 25f.

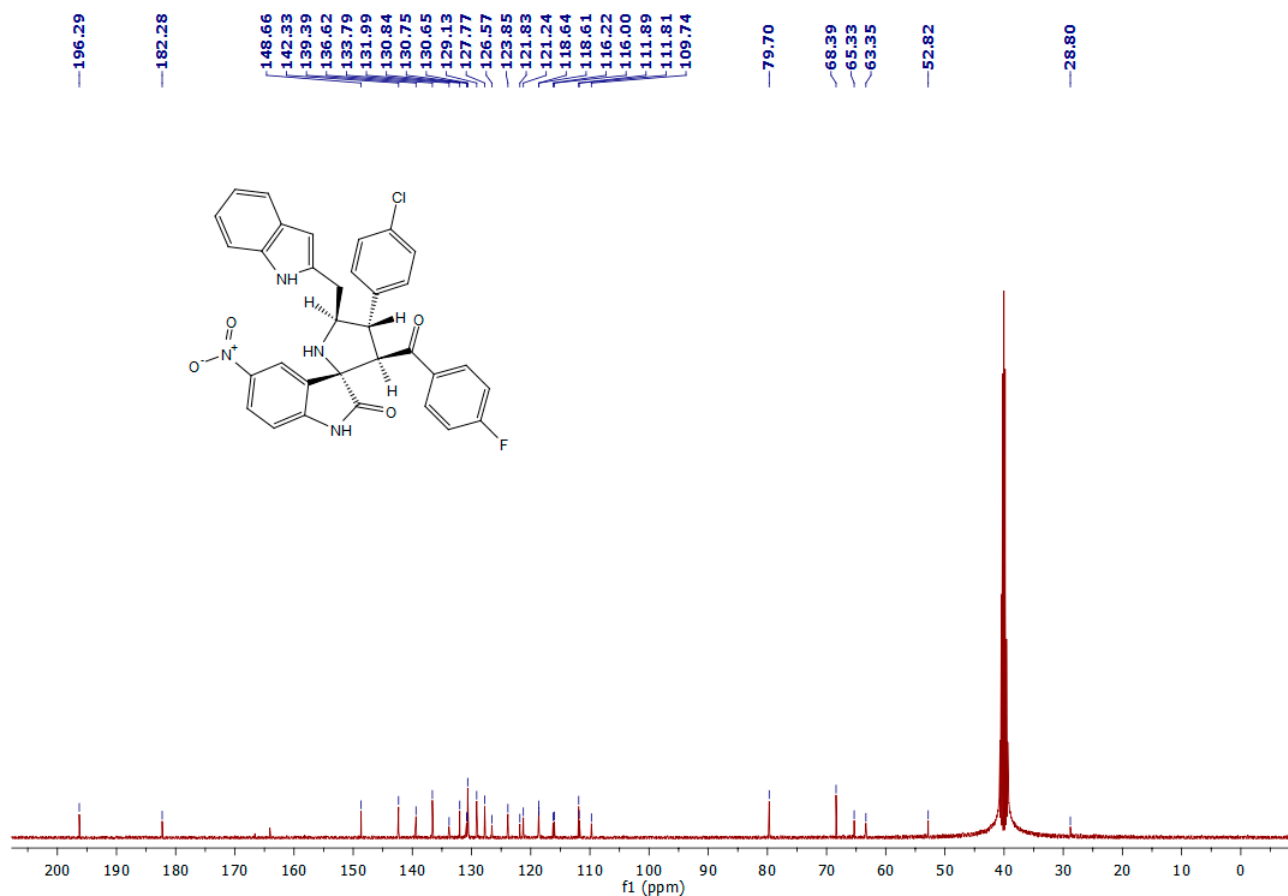

Figure S36:  $^{13}\text{C}$ -NMR spectra of compound 25f.

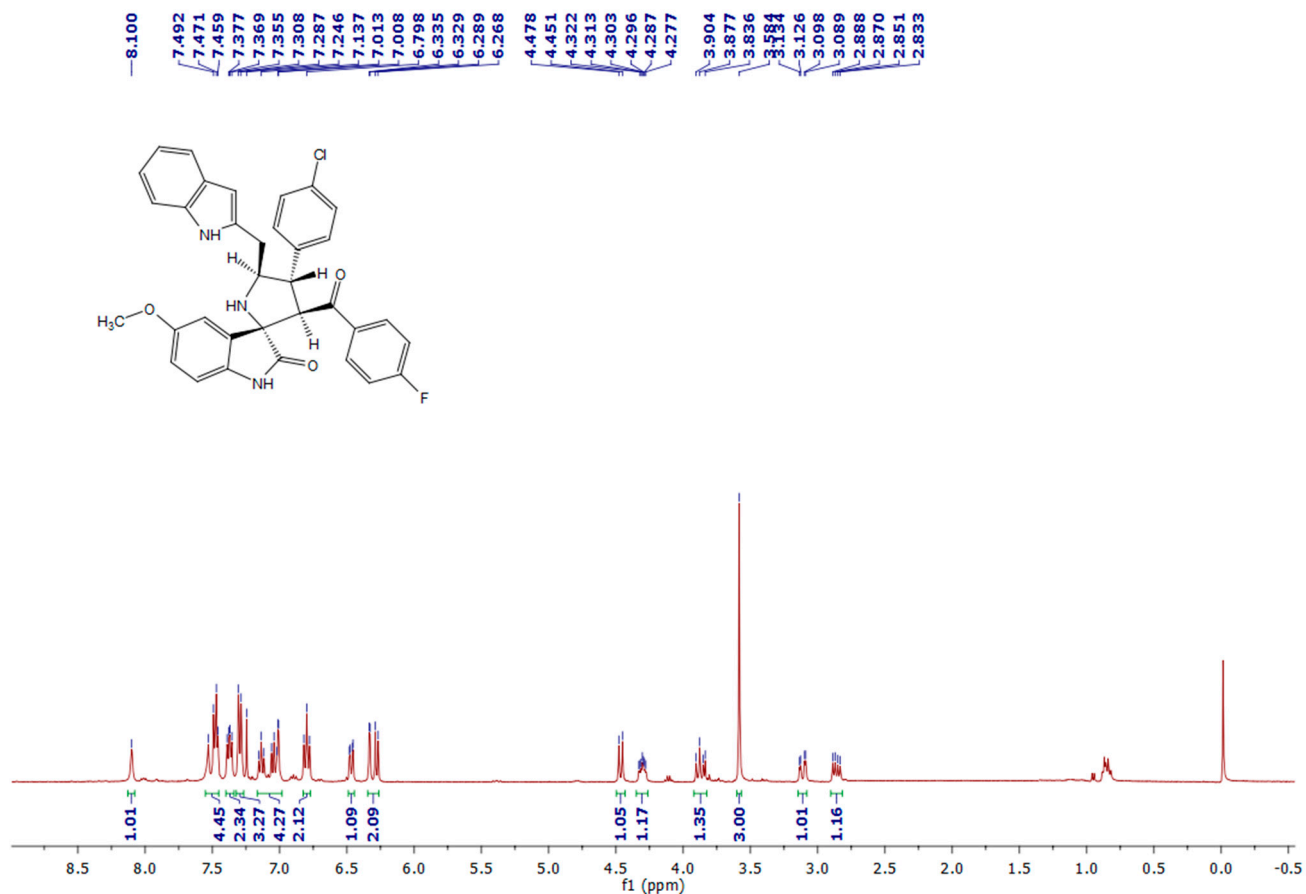

Figure S37: <sup>1</sup>H-NMR spectra of compound 25g.

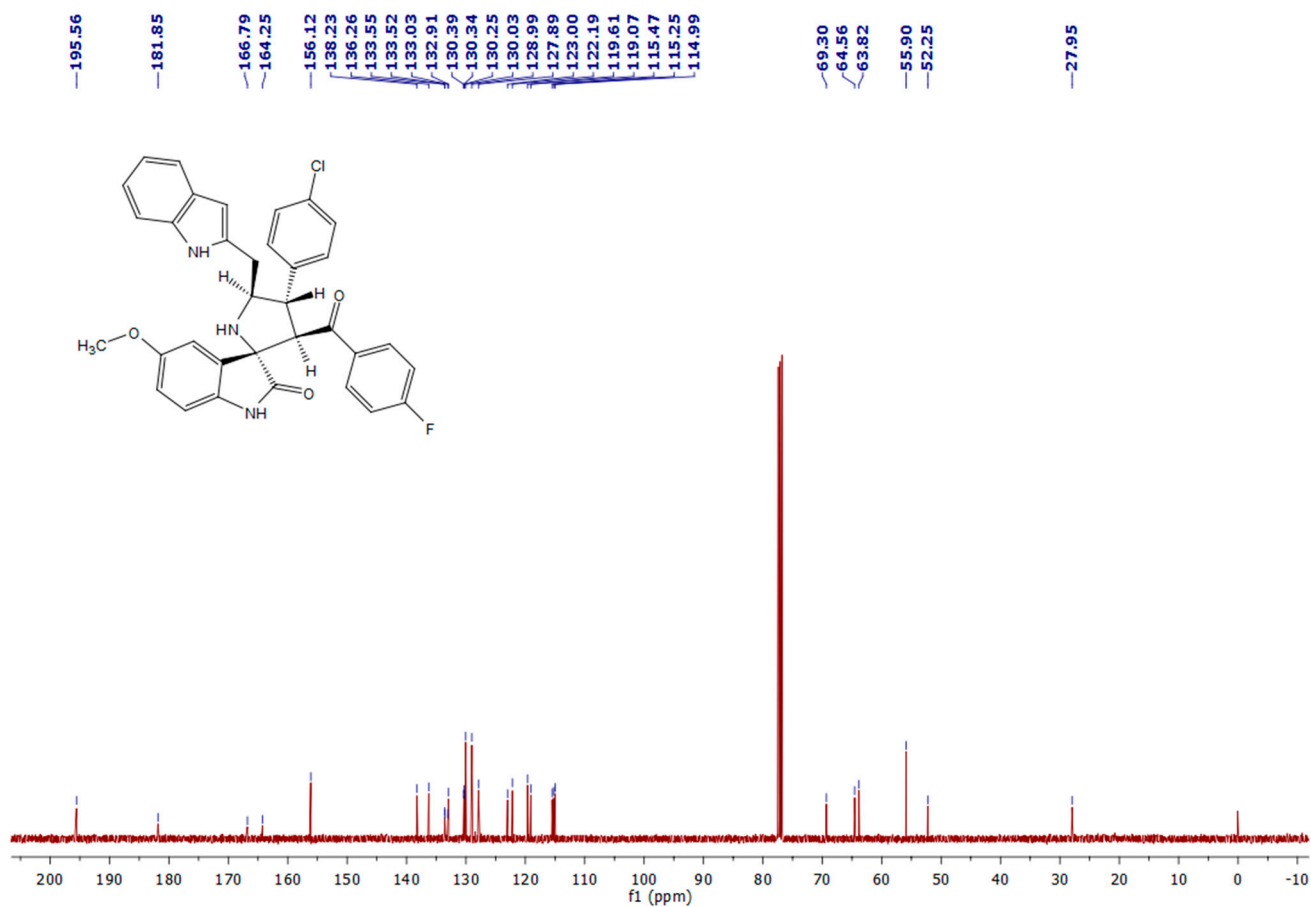

Figure S38: <sup>13</sup>C-NMR spectra of compound 25g.
